# Supplementary material for: A heterogeneous label propagation approach to explore the potential associations between miRNA and disease
Source: J Transl Med. 2018 Dec 11;16:348. doi: 10.1186/s12967-018-1722-1 (PMC6290528; doi:10.1186/s12967-018-1722-1)
Supplement: Supplementary file 1 — Additional file 1. All candidate miRNAs were ranked by HLPMDA for all the diseases in HMDD v2.0. Prediction results could be obtained publicly for further research and experimental validation. [file 12967_2018_1722_MOESM1_ESM.xlsx]

## Sheet: sheet1
Disease	miRNA	Score
Carcinoma, Hepatocellular	hsa-mir-143	0.00399465
Stomach Neoplasms	hsa-let-7b	0.00393638
Stomach Neoplasms	hsa-let-7c	0.00381985
Carcinoma, Hepatocellular	hsa-mir-9	0.00379659
Carcinoma, Hepatocellular	hsa-mir-34b	0.00378986
Stomach Neoplasms	hsa-mir-19b	0.0036921
Stomach Neoplasms	hsa-mir-92a	0.00368984
Melanoma	hsa-mir-92a	0.00362506
Stomach Neoplasms	hsa-let-7e	0.00362283
Stomach Neoplasms	hsa-let-7d	0.00360132
Stomach Neoplasms	hsa-let-7i	0.00352036
Lung Neoplasms	hsa-mir-16	0.00350194
Stomach Neoplasms	hsa-mir-29b	0.00349216
Carcinoma, Hepatocellular	hsa-mir-429	0.00346491
Prostatic Neoplasms	hsa-mir-155	0.00343036
Colorectal Neoplasms	hsa-let-7f	0.0033851
Colorectal Neoplasms	hsa-mir-223	0.00337495
Carcinoma, Renal Cell	hsa-mir-17	0.0033699
Stomach Neoplasms	hsa-mir-210	0.00334343
Carcinoma, Hepatocellular	hsa-mir-132	0.00333961
Stomach Neoplasms	hsa-mir-205	0.00333771
Carcinoma, Hepatocellular	hsa-mir-133a	0.00332673
Breast Neoplasms	hsa-mir-142	0.00331558
Breast Neoplasms	hsa-mir-106a	0.00331391
Colorectal Neoplasms	hsa-let-7d	0.00331357
Breast Neoplasms	hsa-mir-150	0.00329548
Carcinoma, Renal Cell	hsa-mir-20a	0.00329281
Stomach Neoplasms	hsa-mir-203	0.00324908
Colorectal Neoplasms	hsa-let-7i	0.00324379
Colorectal Neoplasms	hsa-mir-125a	0.00323429
Stomach Neoplasms	hsa-mir-15a	0.00323331
Carcinoma, Renal Cell	hsa-mir-125b	0.00322249
Carcinoma, Squamous Cell	hsa-mir-17	0.00320868
Ovarian Neoplasms	hsa-mir-143	0.00320534
Colorectal Neoplasms	hsa-let-7g	0.0032031
Prostatic Neoplasms	hsa-mir-18a	0.00319415
Lung Neoplasms	hsa-mir-106b	0.00318514
Prostatic Neoplasms	hsa-mir-19a	0.00316875
Pancreatic Neoplasms	hsa-mir-19a	0.00316667
Melanoma	hsa-mir-181b	0.00316101
Breast Neoplasms	hsa-mir-192	0.00314799
Colorectal Neoplasms	hsa-mir-29b	0.00314501
Colorectal Neoplasms	hsa-mir-101	0.00314089
Breast Neoplasms	hsa-mir-130a	0.00313897
Colorectal Neoplasms	hsa-mir-106b	0.00311877
Prostatic Neoplasms	hsa-mir-19b	0.00311619
Ovarian Neoplasms	hsa-mir-222	0.00310254
Carcinoma, Renal Cell	hsa-mir-18a	0.00310194
Lung Neoplasms	hsa-mir-15a	0.00306406
Pancreatic Neoplasms	hsa-mir-19b	0.00305993
Carcinoma, Renal Cell	hsa-mir-19b	0.00305507
Melanoma	hsa-mir-223	0.00305456
Melanoma	hsa-mir-10b	0.00305191
Lung Neoplasms	hsa-mir-141	0.00303688
Carcinoma, Hepatocellular	hsa-mir-135b	0.00303587
Breast Neoplasms	hsa-mir-15b	0.00302992
Stomach Neoplasms	hsa-mir-133a	0.00302067
Carcinoma, Hepatocellular	hsa-mir-194	0.00301496
Colorectal Neoplasms	hsa-mir-205	0.00299155
Ovarian Neoplasms	hsa-mir-205	0.00298934
Colorectal Neoplasms	hsa-mir-214	0.00298347
Pancreatic Neoplasms	hsa-mir-141	0.00298063
Intervertebral Disk	hsa-mir-21	0.00297473
Francisella	hsa-mir-21	0.00297473
Fibroblasts	hsa-mir-21	0.00297473
Colorectal Neoplasms	hsa-mir-15a	0.00297286
Prostatic Neoplasms	hsa-let-7e	0.00295496
Pancreatic Neoplasms	hsa-mir-1	0.00294994
Adrenocortical Carcinoma	hsa-mir-21	0.00294483
Endothelium, Vascular	hsa-mir-21	0.00294458
Pancreatic Neoplasms	hsa-mir-29a	0.00294188
Ovarian Neoplasms	hsa-mir-203	0.00294101
Pancreatic Neoplasms	hsa-mir-9	0.00293451
HCMV Infection	hsa-mir-21	0.00293419
Carcinoma, Hepatocellular	hsa-mir-302a	0.00293124
Prostatic Neoplasms	hsa-mir-9	0.00293112
Stomach Neoplasms	hsa-mir-15b	0.00293046
Leukemia, Acute	hsa-mir-21	0.00292977
Prostatic Neoplasms	hsa-let-7f	0.00292469
Prostatic Neoplasms	hsa-let-7i	0.00292451
Colorectal Neoplasms	hsa-mir-24	0.00291333
Breast Neoplasms	hsa-mir-92b	0.00291167
Ovarian Neoplasms	hsa-mir-29c	0.0029114
Carcinoma, Oral	hsa-mir-21	0.00291023
Ovarian Neoplasms	hsa-mir-210	0.00290942
HEV	hsa-mir-21	0.00290883
Papilary thyroid carcinoma	hsa-mir-21	0.00290883
Leukemia, Myeloid, Acute	hsa-mir-21	0.0029087
Ischemic Preconditioning	hsa-mir-21	0.00290719
Breast Neoplasms	hsa-mir-30e	0.00290351
Carcinoma, Hepatocellular	hsa-mir-23b	0.00290338
Neoplasms	hsa-mir-223	0.0029
Synapses	hsa-mir-21	0.00289863
SIV Infection	hsa-mir-21	0.00289591
Ovary Syndrome	hsa-mir-21	0.00289349
Stomach Neoplasms	hsa-mir-30a	0.00289235
Head and Neck Neoplasms	hsa-mir-17	0.00288847
Lung Neoplasms	hsa-mir-429	0.0028883
Ovarian Neoplasms	hsa-mir-15a	0.00288626
Patau Syndrome	hsa-mir-21	0.00288602
Carcinoma, Hepatocellular	hsa-mir-204	0.00288398
Glioma	hsa-mir-19b	0.00288128
HCV	hsa-mir-21	0.00287757
Erythropoiesis	hsa-mir-21	0.00287577
Breast Neoplasms	hsa-mir-98	0.00286436
Glioma	hsa-mir-92a	0.00286101
Urinary Bladder Neoplasms	hsa-let-7a	0.00285706
Melanoma	hsa-mir-101	0.00285348
Carcinoma, Hepatocellular	hsa-mir-30e	0.00285237
Head and Neck Neoplasms	hsa-mir-20a	0.00284404
Colorectal Neoplasms	hsa-mir-132	0.00283671
Esophageal Neoplasms	hsa-mir-125b	0.00283621
Colorectal Neoplasms	hsa-mir-30c	0.00283508
Ovarian Neoplasms	hsa-mir-7	0.00283223
Melanoma	hsa-mir-29c	0.00282966
Esophageal Neoplasms	hsa-mir-200b	0.00280332
Melanoma	hsa-mir-30c	0.00280269
Retinoblastoma	hsa-mir-21	0.00280256
Carcinoma, Renal Cell	hsa-mir-221	0.00280118
Glioma	hsa-mir-19a	0.00279983
Prostatic Neoplasms	hsa-mir-429	0.00279782
HIV-1	hsa-mir-21	0.00279781
Prostatic Neoplasms	hsa-let-7g	0.00279591
Carcinoma, Non-Small-Cell Lung	hsa-mir-20a	0.00279336
Colorectal Neoplasms	hsa-mir-29c	0.00279258
SARS Virus	hsa-mir-21	0.00279184
Colorectal Neoplasms	hsa-mir-192	0.00278624
Breast Neoplasms	hsa-mir-372	0.00278377
PRRSV Infection	hsa-mir-21	0.00277895
Stomach Neoplasms	hsa-mir-26a	0.00277683
Urinary Bladder Neoplasms	hsa-let-7b	0.00277338
Carcinoma, Hepatocellular	hsa-mir-215	0.00276584
Carcinoma, Hepatocellular	hsa-mir-367	0.00276319
Melanoma	hsa-mir-24	0.00275529
Neoplasms	hsa-mir-146b	0.00274734
Carcinoma, Squamous Cell	hsa-let-7a	0.00274673
Esophageal Neoplasms	hsa-mir-17	0.00274367
Carcinoma, Hepatocellular	hsa-mir-339	0.00274362
Carcinoma, Non-Small-Cell Lung	hsa-let-7c	0.00273744
Carcinoma, Squamous Cell	hsa-mir-19a	0.0027343
Lung Neoplasms	hsa-mir-20b	0.00273266
Head and Neck Neoplasms	hsa-mir-200b	0.00272657
Melanoma	hsa-mir-127	0.00272359
Toxoplasma	hsa-mir-21	0.00272093
Ovarian Neoplasms	hsa-mir-196a	0.0027125
Prostatic Neoplasms	hsa-mir-29c	0.00270772
Head and Neck Neoplasms	hsa-mir-126	0.0027045
Colorectal Neoplasms	hsa-mir-191	0.00269989
Pancreatic Neoplasms	hsa-mir-125a	0.0026983
Ovarian Neoplasms	hsa-mir-181b	0.00269649
Pancreatic Neoplasms	hsa-mir-106b	0.00268397
Colorectal Neoplasms	hsa-mir-100	0.00268252
Colonic Neoplasms	hsa-mir-200a	0.00267994
Pancreatic Neoplasms	hsa-mir-205	0.00267855
Prostatic Neoplasms	hsa-mir-210	0.00267531
Colonic Neoplasms	hsa-mir-199a	0.00266926
Neoplasms	hsa-mir-1	0.00266912
Carcinoma, Squamous Cell	hsa-mir-221	0.00266881
Head and Neck Neoplasms	hsa-mir-92a	0.00266677
Carcinoma, Non-Small-Cell Lung	hsa-mir-18a	0.0026648
Lung Neoplasms	hsa-mir-195	0.00266418
Carcinoma, Hepatocellular	hsa-mir-32	0.00266263
Urinary Bladder Neoplasms	hsa-let-7d	0.00265964
Stomach Neoplasms	hsa-mir-30d	0.00265623
Carcinoma, Hepatocellular	hsa-mir-193b	0.00265589
Carcinoma, Non-Small-Cell Lung	hsa-let-7e	0.0026549
Breast Neoplasms	hsa-mir-99b	0.00265322
Urinary Bladder Neoplasms	hsa-let-7c	0.00265014
Breast Neoplasms	hsa-mir-32	0.00264642
Carcinoma, Renal Cell	hsa-mir-29b	0.00264433
Carcinoma, Non-Small-Cell Lung	hsa-mir-19b	0.00264185
Carcinoma, Squamous Cell	hsa-mir-200b	0.00264074
Ovarian Neoplasms	hsa-mir-181a	0.00263651
Carcinoma, Renal Cell	hsa-mir-222	0.00263472
Adenocarcinoma	hsa-mir-34a	0.00263325
Prostatic Neoplasms	hsa-mir-125a	0.00263283
Glioma	hsa-mir-155	0.00262046
Carcinoma, Non-Small-Cell Lung	hsa-mir-19a	0.00261817
Carcinoma, Hepatocellular	hsa-mir-196b	0.00261805
Esophageal Neoplasms	hsa-mir-18a	0.0026166
Carcinoma, Hepatocellular	hsa-mir-302d	0.00261579
Colonic Neoplasms	hsa-mir-222	0.00260848
Head and Neck Neoplasms	hsa-mir-200a	0.00260789
Carcinoma, Hepatocellular	hsa-mir-95	0.00260412
Carcinoma, Renal Cell	hsa-mir-15a	0.00259864
Carcinoma, Non-Small-Cell Lung	hsa-let-7f	0.00259746
Colorectal Neoplasms	hsa-mir-15b	0.0025924
Heart Failure	hsa-mir-20a	0.0025906
Esophageal Neoplasms	hsa-mir-16	0.00258531
Esophageal Neoplasms	hsa-mir-221	0.00258421
Colorectal Neoplasms	hsa-mir-302b	0.00258413
Carcinoma, Renal Cell	hsa-mir-29a	0.00258125
Gastrointestinal Neoplasms	hsa-mir-21	0.00258099
Carcinoma, Hepatocellular	hsa-mir-137	0.00257976
Urinary Bladder Neoplasms	hsa-mir-16	0.00257966
Head and Neck Neoplasms	hsa-mir-146a	0.0025787
Ovarian Neoplasms	hsa-mir-142	0.00257849
Pancreatic Neoplasms	hsa-mir-29c	0.00257539
Pancreatic Neoplasms	hsa-mir-127	0.00257444
Head and Neck Neoplasms	hsa-mir-19a	0.00257441
Prostatic Neoplasms	hsa-mir-10b	0.00257061
Lung Neoplasms	hsa-mir-15b	0.0025682
Carcinoma, Renal Cell	hsa-mir-1	0.00256687
Prostatic Neoplasms	hsa-mir-196a	0.00256404
Carcinoma, Hepatocellular	hsa-mir-206	0.00256257
Carcinoma, Renal Cell	hsa-mir-223	0.00256155
Carcinoma	hsa-mir-17	0.00256007
Prostatic Neoplasms	hsa-mir-7	0.00255266
Carcinoma, Hepatocellular	hsa-mir-27b	0.00254917
Carcinoma, Non-Small-Cell Lung	hsa-let-7i	0.00254849
HBV Infection	hsa-mir-21	0.00254558
Breast Neoplasms	hsa-mir-99a	0.00254289
Pancreatic Neoplasms	hsa-mir-7	0.00254274
Carcinoma, Renal Cell	hsa-mir-214	0.00254265
Stomach Neoplasms	hsa-mir-98	0.00254197
Colorectal Neoplasms	hsa-mir-30b	0.00253731
Colorectal Neoplasms	hsa-mir-296	0.00253587
Breast Neoplasms	hsa-mir-196b	0.00253572
Breast Neoplasms	hsa-mir-130b	0.00253539
Carcinoma, Non-Small-Cell Lung	hsa-mir-92a	0.00253462
Glioblastoma	hsa-mir-126	0.00252741
Melanoma	hsa-mir-150	0.00251822
Stomach Neoplasms	hsa-mir-92b	0.00251797
Head and Neck Neoplasms	hsa-mir-16	0.00251494
Melanoma	hsa-mir-27a	0.00251225
Stomach Neoplasms	hsa-mir-338	0.0025116
Lung Neoplasms	hsa-mir-130a	0.00250773
Urinary Bladder Neoplasms	hsa-let-7f	0.00250293
Pancreatic Neoplasms	hsa-mir-93	0.00250258
Colonic Neoplasms	hsa-mir-34c	0.00250134
Urinary Bladder Neoplasms	hsa-let-7e	0.00249795
Melanoma	hsa-mir-132	0.0024971
Neoplasms	hsa-mir-203	0.00249706
Glioblastoma	hsa-mir-106b	0.00249511
Head and Neck Neoplasms	hsa-mir-19b	0.00249317
Colorectal Neoplasms	hsa-mir-20b	0.00249244
Urinary Bladder Neoplasms	hsa-let-7i	0.00249113
Helplessness, Learned	hsa-mir-21	0.00249089
Melanoma	hsa-mir-92b	0.00248807
Urinary Bladder Neoplasms	hsa-mir-223	0.00248719
Carcinoma, Renal Cell	hsa-mir-125a	0.00248497
Pancreatic Neoplasms	hsa-mir-181a	0.00248425
Stomach Neoplasms	hsa-mir-23b	0.00248399
Carcinoma, Non-Small-Cell Lung	hsa-mir-200a	0.00248353
Leukemia, Myeloid, Acute	hsa-mir-16	0.00248305
Adenocarcinoma	hsa-mir-125b	0.00248176
Ovarian Neoplasms	hsa-mir-24	0.00247656
Stomach Neoplasms	hsa-mir-219	0.00247618
Carcinoma, Hepatocellular	hsa-mir-153	0.00247513
Glioma	hsa-let-7a	0.00247461
Adenocarcinoma	hsa-mir-18a	0.00246836
Neoplasms	hsa-mir-133a	0.00246749
Prostatic Neoplasms	hsa-mir-181a	0.00246615
Trophoblasts	hsa-mir-21	0.00245818
Melanoma	hsa-mir-199b	0.0024575
Urinary Bladder Neoplasms	hsa-mir-29a	0.00245593
Carcinoma, Non-Small-Cell Lung	hsa-mir-29a	0.00245586
Neoplasms	hsa-mir-196a	0.0024554
Ovarian Neoplasms	hsa-mir-15b	0.00245431
Breast Neoplasms	hsa-mir-151	0.0024539
Head and Neck Neoplasms	hsa-mir-222	0.00245165
Breast Neoplasms	hsa-mir-95	0.00245092
Melanoma	hsa-mir-373	0.00245044
Ovarian Neoplasms	hsa-mir-132	0.00244706
Heart Failure	hsa-mir-34a	0.00244629
Carcinoma, Renal Cell	hsa-mir-182	0.00244579
Ovarian Neoplasms	hsa-mir-106a	0.00244514
Esophageal Neoplasms	hsa-mir-1	0.00244409
Lymphoma	hsa-mir-125b	0.00243945
Urinary Bladder Neoplasms	hsa-mir-146b	0.00243525
Stomach Neoplasms	hsa-mir-367	0.00243208
Stomach Neoplasms	hsa-mir-30e	0.00242884
HPV Infection	hsa-mir-21	0.00242542
Melanoma	hsa-mir-100	0.00242432
Carcinoma, Renal Cell	hsa-mir-181b	0.00242374
Ovarian Neoplasms	hsa-mir-199b	0.00242177
Esophageal Neoplasms	hsa-mir-222	0.00241975
Stomach Neoplasms	hsa-mir-339	0.00241589
Urinary Bladder Neoplasms	hsa-let-7g	0.00241537
Carcinoma, Hepatocellular	hsa-mir-151	0.00241359
Esophageal Neoplasms	hsa-let-7e	0.00240805
Carcinoma, Renal Cell	hsa-mir-25	0.00240491
Prostatic Neoplasms	hsa-mir-142	0.00240459
Carcinoma, Squamous Cell	hsa-let-7c	0.00240233
Endometrial Neoplasms	hsa-mir-145	0.00240039
Ovarian Neoplasms	hsa-mir-195	0.00239701
Colonic Neoplasms	hsa-mir-196a	0.00239633
Head and Neck Neoplasms	hsa-mir-34c	0.00239489
Stomach Neoplasms	hsa-mir-215	0.00239103
Esophageal Neoplasms	hsa-let-7f	0.00238863
Carcinoma, Hepatocellular	hsa-mir-28	0.00238601
Lung Neoplasms	hsa-mir-302b	0.00238439
Glioblastoma	hsa-let-7b	0.00238366
Ovarian Neoplasms	hsa-mir-150	0.00238195
Carcinoma	hsa-mir-18a	0.00238095
Glioblastoma	hsa-mir-125a	0.00237882
Multiple Myeloma	hsa-mir-155	0.00237723
Pancreatic Neoplasms	hsa-mir-133a	0.00236899
Carcinoma, Hepatocellular	hsa-mir-449a	0.00236724
Carcinoma, Renal Cell	hsa-mir-183	0.00236472
Glioblastoma	hsa-let-7c	0.00236047
Colorectal Neoplasms	hsa-mir-302c	0.00235315
Colorectal Neoplasms	hsa-mir-302a	0.00235053
Carcinoma, Squamous Cell	hsa-let-7b	0.00234917
Melanoma	hsa-mir-224	0.0023488
Colonic Neoplasms	hsa-mir-146b	0.00234612
Ovarian Neoplasms	hsa-mir-18b	0.00234507
Carcinoma, Non-Small-Cell Lung	hsa-mir-203	0.00234385
Colonic Neoplasms	hsa-mir-34b	0.00234344
Melanoma	hsa-mir-130a	0.00234182
Melanoma	hsa-mir-192	0.00233797
Glioma	hsa-let-7d	0.0023379
Esophageal Neoplasms	hsa-mir-19b	0.00233682
Glioblastoma	hsa-mir-29b	0.00233557
Lymphoma	hsa-mir-34a	0.00233548
Esophageal Neoplasms	hsa-mir-29a	0.00233531
Urinary Bladder Neoplasms	hsa-mir-106b	0.00233439
Carcinoma, Hepatocellular	hsa-mir-186	0.00233405
Carcinoma, Squamous Cell	hsa-mir-200a	0.002332
Prostatic Neoplasms	hsa-mir-24	0.00232746
Uterine Cervical Neoplasms	hsa-mir-200b	0.00232684
Breast Neoplasms	hsa-mir-28	0.00232671
Adenocarcinoma	hsa-mir-19b	0.00232612
Stomach Neoplasms	hsa-mir-99b	0.00232489
Carcinoma, Renal Cell	hsa-mir-133a	0.00232331
Esophageal Neoplasms	hsa-let-7d	0.00232227
Breast Neoplasms	hsa-mir-212	0.00232203
Carcinoma, Hepatocellular	hsa-mir-383	0.00232192
Breast Neoplasms	hsa-mir-186	0.00232109
Glioblastoma	hsa-mir-214	0.00231956
Endometrial Neoplasms	hsa-mir-17	0.00231952
Nasopharyngeal Neoplasms	hsa-mir-21	0.00231722
Melanoma	hsa-mir-335	0.00231648
Esophageal Neoplasms	hsa-let-7i	0.00231647
Prostatic Neoplasms	hsa-mir-192	0.00231629
Esophageal Neoplasms	hsa-mir-9	0.00231284
Glioblastoma	hsa-mir-223	0.0023107
Head and Neck Neoplasms	hsa-mir-199a	0.00230955
Esophageal Neoplasms	hsa-let-7g	0.00230904
Glioblastoma	hsa-let-7i	0.00230861
Neoplasms	hsa-mir-195	0.00230853
Carcinoma	hsa-mir-92a	0.00230497
Urinary Bladder Neoplasms	hsa-mir-214	0.00230361
Lung Neoplasms	hsa-mir-302a	0.00230268
Colorectal Neoplasms	hsa-mir-30d	0.00230256
Lung Neoplasms	hsa-mir-92b	0.00230043
Glioblastoma	hsa-mir-34c	0.00229962
Retinoblastoma	hsa-mir-145	0.00229719
Thyroid Neoplasms	hsa-mir-145	0.00229395
Carcinoma, Renal Cell	hsa-mir-192	0.00229365
Pancreatic Neoplasms	hsa-mir-30a	0.00229313
Carcinoma, Squamous Cell	hsa-mir-146b	0.00229278
Head and Neck Neoplasms	hsa-mir-34b	0.00229021
Carcinoma, Hepatocellular	hsa-mir-452	0.00228974
Pancreatic Neoplasms	hsa-mir-18b	0.00228956
Urinary Bladder Neoplasms	hsa-mir-125a	0.00228713
Carcinoma, Renal Cell	hsa-mir-181a	0.00228628
Adrenocortical Carcinoma	hsa-mir-34a	0.00228421
Prostatic Neoplasms	hsa-mir-199b	0.00228417
Endometrial Neoplasms	hsa-mir-20a	0.00228312
Carcinoma, Non-Small-Cell Lung	hsa-mir-106b	0.00228256
Glioblastoma	hsa-let-7f	0.00228252
Colonic Neoplasms	hsa-mir-203	0.00228018
Lung Neoplasms	hsa-mir-302c	0.00227998
Breast Neoplasms	hsa-mir-449a	0.00227667
Neoplasms	hsa-mir-142	0.00227636
Glioma	hsa-mir-126	0.00227542
Carcinoma, Non-Small-Cell Lung	hsa-mir-181b	0.00227511
Pancreatic Neoplasms	hsa-mir-195	0.00226894
Glioblastoma	hsa-mir-200a	0.00226611
Colonic Neoplasms	hsa-mir-181b	0.00226536
Carcinoma, Hepatocellular	hsa-mir-488	0.00226425
Prostatic Neoplasms	hsa-mir-20b	0.00225992
Neoplasms	hsa-mir-30b	0.0022595
Carcinoma, Non-Small-Cell Lung	hsa-mir-133a	0.00225878
Colorectal Neoplasms	hsa-mir-23b	0.00225764
Ovarian Neoplasms	hsa-mir-107	0.00225412
Colonic Neoplasms	hsa-mir-25	0.00225401
Neoplasms	hsa-mir-135b	0.00225372
Colonic Neoplasms	hsa-mir-210	0.00225281
Medulloblastoma	hsa-mir-155	0.00225233
Carcinoma, Non-Small-Cell Lung	hsa-mir-10b	0.00224978
Neoplasms	hsa-mir-100	0.00224945
Colorectal Neoplasms	hsa-mir-204	0.00224862
Neoplasms	hsa-mir-183	0.00224843
Glioblastoma	hsa-mir-203	0.00224726
Carcinoma, Hepatocellular	hsa-mir-149	0.002247
Thyroid Neoplasms	hsa-let-7a	0.00224491
Stomach Neoplasms	hsa-mir-99a	0.00224458
Melanoma	hsa-mir-135a	0.00224392
Breast Neoplasms	hsa-mir-451	0.00224277
Lung Neoplasms	hsa-mir-373	0.00224223
Carcinoma, Squamous Cell	hsa-mir-199a	0.00224202
Glioblastoma	hsa-let-7e	0.0022415
Carcinoma	hsa-mir-19b	0.00223974
Prostatic Neoplasms	hsa-mir-150	0.00223918
Lung Neoplasms	hsa-mir-194	0.00223908
Glioblastoma	hsa-mir-93	0.00223895
Carcinoma, Squamous Cell	hsa-mir-29b	0.00223874
Uterine Cervical Neoplasms	hsa-let-7a	0.00223597
Breast Neoplasms	hsa-mir-491	0.00223533
Carcinoma, Hepatocellular	hsa-mir-451	0.00223356
Heart Failure	hsa-mir-214	0.00223196
Gastrointestinal Neoplasms	hsa-mir-145	0.00223034
Pancreatic Neoplasms	hsa-mir-130a	0.00222912
Colorectal Neoplasms	hsa-mir-98	0.00222425
Prostatic Neoplasms	hsa-mir-18b	0.00222385
Carcinoma, Hepatocellular	hsa-mir-424	0.00222381
Pancreatic Neoplasms	hsa-mir-30b	0.00221508
Gastrointestinal Neoplasms	hsa-mir-155	0.00221485
Colonic Neoplasms	hsa-mir-214	0.00221266
Glioma	hsa-mir-15a	0.00221193
Esophageal Neoplasms	hsa-mir-218	0.00221155
Carcinoma, Squamous Cell	hsa-mir-29a	0.00220889
Glioma	hsa-mir-146a	0.00220781
Glioblastoma	hsa-mir-199a	0.00220778
Head and Neck Neoplasms	hsa-mir-218	0.00220727
Breast Neoplasms	hsa-mir-449b	0.00220614
Ovarian Neoplasms	hsa-mir-373	0.00220359
Head and Neck Neoplasms	hsa-mir-214	0.00220344
Carcinoma, Hepatocellular	hsa-mir-342	0.00220221
Endometrial Neoplasms	hsa-mir-126	0.00220192
Esophageal Neoplasms	hsa-mir-10b	0.00220103
Carcinoma, Non-Small-Cell Lung	hsa-mir-24	0.00220096
Carcinoma, Renal Cell	hsa-mir-106a	0.00220019
Lung Neoplasms	hsa-mir-193b	0.00220007
Medulloblastoma	hsa-mir-221	0.00219937
Head and Neck Neoplasms	hsa-mir-29a	0.00219858
Adrenocortical Carcinoma	hsa-mir-20a	0.00219773
Glioblastoma	hsa-mir-200c	0.00219541
Ovarian Neoplasms	hsa-mir-26a	0.00219531
Carcinoma, Squamous Cell	hsa-let-7f	0.0021944
Carcinoma, Squamous Cell	hsa-let-7e	0.00219309
Endometrial Neoplasms	hsa-mir-34a	0.00219132
Stomach Neoplasms	hsa-mir-153	0.00219057
Pancreatic Neoplasms	hsa-mir-20b	0.00218784
Carcinoma, Non-Small-Cell Lung	hsa-mir-141	0.0021862
Ovarian Neoplasms	hsa-mir-23b	0.00218435
Uterine Cervical Neoplasms	hsa-mir-200c	0.00218427
Carcinoma, Squamous Cell	hsa-mir-183	0.00218427
Urinary Bladder Neoplasms	hsa-mir-30c	0.00218243
Digestive System Neoplasms	hsa-mir-21	0.00218139
Carcinoma, Renal Cell	hsa-mir-24	0.00217608
Head and Neck Neoplasms	hsa-mir-10b	0.0021756
Carcinoma, Hepatocellular	hsa-mir-494	0.00217452
Stomach Neoplasms	hsa-mir-520b	0.00217409
Head and Neck Neoplasms	hsa-mir-210	0.00217382
Breast Neoplasms	hsa-mir-424	0.0021737
Ovarian Neoplasms	hsa-mir-204	0.00217369
Carcinoma, Basal Cell	hsa-mir-21	0.00217253
Prostatic Neoplasms	hsa-mir-302b	0.00217137
Carcinoma, Non-Small-Cell Lung	hsa-mir-25	0.00217099
Carcinoma, Hepatocellular	hsa-mir-340	0.00216525
Esophageal Neoplasms	hsa-mir-146b	0.00216447
Thyroid Neoplasms	hsa-mir-34a	0.00216368
Lung Neoplasms	hsa-mir-204	0.0021636
Colonic Neoplasms	hsa-mir-29c	0.00216295
Glioblastoma	hsa-let-7g	0.00216256
Colonic Neoplasms	hsa-mir-183	0.00216242
Lung Neoplasms	hsa-mir-296	0.00216228
Colorectal Neoplasms	hsa-mir-32	0.00216143
Stomach Neoplasms	hsa-mir-28	0.00216112
Uterine Cervical Neoplasms	hsa-let-7b	0.00216004
Carcinoma, Squamous Cell	hsa-mir-93	0.00215975
Colonic Neoplasms	hsa-mir-150	0.00215956
Adenocarcinoma	hsa-mir-19a	0.00215889
Pancreatic Neoplasms	hsa-mir-302b	0.00215845
Carcinoma, Renal Cell	hsa-mir-31	0.002158
Heart Failure	hsa-mir-125b	0.00215677
Uterine Cervical Neoplasms	hsa-mir-141	0.00215405
Breast Neoplasms	hsa-mir-181d	0.00215238
Retinoblastoma	hsa-mir-125b	0.00215138
Esophageal Neoplasms	hsa-mir-142	0.00215005
Leukemia, Myeloid, Acute	hsa-mir-200b	0.00214967
Lung Neoplasms	hsa-mir-23b	0.00214936
Glioma	hsa-mir-29a	0.00214779
Heart Failure	hsa-mir-146a	0.00214772
Carcinoma, Renal Cell	hsa-mir-20b	0.00214721
Heart Failure	hsa-mir-221	0.00214665
Carcinoma, Non-Small-Cell Lung	hsa-mir-31	0.0021458
Urinary Bladder Neoplasms	hsa-mir-25	0.00214419
Carcinoma, Squamous Cell	hsa-mir-141	0.00214333
Glioblastoma	hsa-mir-34b	0.00214248
Esophageal Neoplasms	hsa-mir-125a	0.0021413
Carcinoma, Hepatocellular	hsa-mir-299	0.0021412
Leukemia, Myeloid, Acute	hsa-mir-34c	0.00214104
Colonic Neoplasms	hsa-mir-7	0.00214065
Carcinoma, Squamous Cell	hsa-mir-25	0.00213876
Lymphoma	hsa-mir-221	0.00213793
Colonic Neoplasms	hsa-mir-148a	0.002137
Melanoma	hsa-mir-10a	0.00213614
Colonic Neoplasms	hsa-mir-429	0.00213521
Carcinoma, Renal Cell	hsa-mir-15b	0.00213446
Stomach Neoplasms	hsa-mir-10a	0.0021342
Thyroid Neoplasms	hsa-mir-17	0.00213409
Carcinoma, Non-Small-Cell Lung	hsa-mir-30c	0.0021308
Carcinoma, Renal Cell	hsa-mir-194	0.00213037
Pancreatic Neoplasms	hsa-mir-30d	0.00212992
Leukemia	hsa-mir-155	0.00212718
Breast Neoplasms	hsa-mir-198	0.00212677
Prostatic Neoplasms	hsa-mir-30b	0.00212406
Esophageal Neoplasms	hsa-mir-7	0.00212377
Head and Neck Neoplasms	hsa-mir-29b	0.00212299
Colorectal Neoplasms	hsa-mir-30e	0.0021222
Carcinoma, Renal Cell	hsa-mir-135b	0.00212185
Medulloblastoma	hsa-mir-200b	0.00212062
Heart Failure	hsa-mir-222	0.00211798
Glioblastoma	hsa-mir-182	0.00211711
Carcinoma, Non-Small-Cell Lung	hsa-mir-127	0.00211419
Melanoma	hsa-mir-196b	0.00211365
Thyroid Neoplasms	hsa-let-7b	0.00211318
Prostatic Neoplasms	hsa-mir-302a	0.00211154
Medulloblastoma	hsa-mir-16	0.00211126
Heart Failure	hsa-let-7i	0.00211079
Prostatic Neoplasms	hsa-mir-302c	0.00210976
Precursor Cell Lymphoblastic Leukemia-Lymphoma	hsa-mir-155	0.00210839
Carcinoma, Hepatocellular	hsa-mir-376c	0.0021083
Colonic Neoplasms	hsa-mir-181a	0.00210683
Glioma	hsa-let-7b	0.00210434
Medulloblastoma	hsa-let-7a	0.00210386
Colorectal Neoplasms	hsa-mir-196b	0.00210233
Colonic Neoplasms	hsa-mir-27a	0.00209923
Glioblastoma	hsa-mir-24	0.00209894
Carcinoma, Hepatocellular	hsa-mir-516b	0.00209867
Esophageal Neoplasms	hsa-mir-29b	0.00209575
Carcinoma, Non-Small-Cell Lung	hsa-mir-132	0.00209485
Glioblastoma	hsa-mir-141	0.00209405
Adrenocortical Carcinoma	hsa-mir-92a	0.00209371
Neoplasms	hsa-mir-194	0.00209156
Urinary Bladder Neoplasms	hsa-mir-181a	0.00208992
Colonic Neoplasms	hsa-mir-93	0.00208856
Melanoma	hsa-mir-98	0.00208764
Carcinoma, Renal Cell	hsa-mir-30a	0.00208713
Melanoma	hsa-mir-206	0.00208678
Carcinoma, Hepatocellular	hsa-mir-516a	0.0020865
Esophageal Neoplasms	hsa-mir-106a	0.00208442
Adrenocortical Carcinoma	hsa-mir-18a	0.00208434
Carcinoma, Renal Cell	hsa-mir-18b	0.00208433
Thyroid Neoplasms	hsa-mir-20a	0.002083
Pancreatic Neoplasms	hsa-mir-22	0.00208058
Neoplasms	hsa-mir-192	0.00208009
Glioma	hsa-mir-125a	0.00207976
Melanoma	hsa-mir-372	0.00207965
Neoplasms	hsa-mir-148a	0.00207893
Carcinoma, Renal Cell	hsa-mir-148a	0.00207877
Prostatic Neoplasms	hsa-mir-30a	0.00207761
Glioma	hsa-let-7c	0.00207483
Carcinoma, Non-Small-Cell Lung	hsa-mir-142	0.00207365
Ovarian Neoplasms	hsa-mir-124	0.00206781
Glioma	hsa-mir-34c	0.00206765
Retinoblastoma	hsa-mir-155	0.00206646
Precursor Cell Lymphoblastic Leukemia-Lymphoma	hsa-mir-20a	0.00206564
Neoplasms	hsa-mir-26a	0.00206421
Heart Failure	hsa-mir-9	0.00206367
Osteosarcoma	hsa-mir-155	0.00206111
Carcinoma	hsa-mir-19a	0.0020603
Esophageal Neoplasms	hsa-mir-106b	0.00205915
Carcinoma, Squamous Cell	hsa-let-7g	0.00205769
Endometrial Neoplasms	hsa-mir-34c	0.00205744
Colorectal Neoplasms	hsa-mir-193b	0.00205533
Uterine Cervical Neoplasms	hsa-mir-18a	0.00205529
Glioma	hsa-mir-210	0.00205399
Head and Neck Neoplasms	hsa-mir-183	0.00205261
Leukemia, Myeloid, Acute	hsa-mir-9	0.00205103
Head and Neck Neoplasms	hsa-mir-106b	0.00205048
Uterine Cervical Neoplasms	hsa-let-7c	0.00204852
Uterine Cervical Neoplasms	hsa-let-7d	0.00204829
Adenocarcinoma	hsa-mir-106b	0.00204684
Adenocarcinoma	hsa-mir-222	0.00204602
Breast Neoplasms	hsa-mir-181c	0.00204196
Glioma	hsa-mir-29b	0.00204189
Endometrial Neoplasms	hsa-mir-146a	0.00204086
Head and Neck Neoplasms	hsa-mir-127	0.00204063
Neoplasms	hsa-mir-107	0.00203992
Carcinoma, Hepatocellular	hsa-mir-211	0.00203689
Glioma	hsa-mir-200a	0.00203609
Urinary Bladder Neoplasms	hsa-mir-194	0.00203519
Carcinoma, Renal Cell	hsa-mir-130a	0.0020348
Endometrial Neoplasms	hsa-mir-19a	0.00203417
Head and Neck Neoplasms	hsa-mir-25	0.00203416
Esophageal Neoplasms	hsa-mir-127	0.00203372
Leukemia, Myeloid, Acute	hsa-mir-199a	0.0020337
Head and Neck Neoplasms	hsa-mir-196a	0.00203341
Esophageal Neoplasms	hsa-mir-429	0.00203237
Carcinoma	hsa-mir-143	0.00203192
Heart Failure	hsa-mir-200b	0.00203108
Colonic Neoplasms	hsa-mir-133a	0.00203035
Lymphoma	hsa-mir-145	0.00202759
Carcinoma, Squamous Cell	hsa-mir-7	0.00202724
Glioma	hsa-mir-203	0.00202447
Thyroid Neoplasms	hsa-mir-18a	0.00202425
Esophageal Neoplasms	hsa-mir-181b	0.00202405
Breast Neoplasms	hsa-mir-494	0.00202267
Neoplasms, Squamous Cell	hsa-mir-17	0.00202056
Urinary Bladder Neoplasms	hsa-mir-106a	0.00201988
Glioblastoma	hsa-mir-196a	0.00201927
Glioma	hsa-mir-25	0.00201925
Neoplasms, Squamous Cell	hsa-mir-20a	0.00201899
Glioma	hsa-let-7i	0.00201763
Hematologic Neoplasms	hsa-mir-21	0.00201522
Ovarian Neoplasms	hsa-mir-372	0.00201496
Glioblastoma	hsa-mir-15b	0.00201328
Uterine Cervical Neoplasms	hsa-mir-92a	0.00201263
Adrenocortical Carcinoma	hsa-mir-221	0.00201222
Pancreatic Neoplasms	hsa-mir-373	0.00201128
Carcinoma, Renal Cell	hsa-mir-191	0.00200948
Leukemia, Myeloid, Acute	hsa-mir-29c	0.00200938
Heart Failure	hsa-mir-146b	0.00200835
Glioblastoma	hsa-mir-1	0.00200756
Lung Neoplasms	hsa-mir-367	0.00200671
Uterine Cervical Neoplasms	hsa-mir-199a	0.00200667
Carcinoma, Hepatocellular	hsa-mir-520c	0.00200639
Pancreatic Neoplasms	hsa-mir-302c	0.00200523
Colonic Neoplasms	hsa-mir-18b	0.00200513
Head and Neck Neoplasms	hsa-mir-93	0.00200436
Carcinoma, Hepatocellular	hsa-mir-184	0.00200386
Glioma	hsa-let-7f	0.00200291
Lung Neoplasms	hsa-mir-372	0.00200012
Neoplasms	hsa-mir-130a	0.0019986
Stomach Neoplasms	hsa-mir-491	0.00199811
Uterine Cervical Neoplasms	hsa-mir-1	0.00199805
Heart Failure	hsa-mir-15a	0.00199639
Carcinoma, Non-Small-Cell Lung	hsa-mir-375	0.00199573
Carcinoma, Squamous Cell	hsa-mir-196a	0.00199494
Glioblastoma	hsa-mir-133a	0.00199405
Toxoplasma	hsa-mir-155	0.00199287
Colorectal Neoplasms	hsa-mir-153	0.00199283
Colorectal Neoplasms	hsa-mir-99b	0.00199128
Carcinoma, Renal Cell	hsa-mir-132	0.00199053
Leukemia	hsa-mir-145	0.00198943
Melanoma	hsa-mir-32	0.00198848
Carcinoma, Squamous Cell	hsa-mir-150	0.0019866
Precursor Cell Lymphoblastic Leukemia-Lymphoma	hsa-mir-21	0.00198659
Glioblastoma	hsa-mir-127	0.00198617
Medulloblastoma	hsa-let-7d	0.00198617
Colonic Neoplasms	hsa-mir-195	0.0019857
Carcinoma, Renal Cell	hsa-mir-296	0.00198473
Endometrial Neoplasms	hsa-mir-221	0.00198329
Carcinoma, Hepatocellular	hsa-mir-301b	0.00198283
Esophagus	hsa-mir-155	0.00198281
Colorectal Neoplasms	hsa-mir-302d	0.00198253
Endometrial Neoplasms	hsa-mir-19b	0.00198215
Breast Neoplasms	hsa-mir-376a	0.00197894
Glioma	hsa-mir-223	0.00197848
Carcinoma, Renal Cell	hsa-mir-30b	0.00197839
Lung Neoplasms	hsa-mir-339	0.0019776
Carcinoma, Renal Cell	hsa-mir-373	0.00197672
Carcinoma, Non-Small-Cell Lung	hsa-mir-192	0.00197599
Colonic Neoplasms	hsa-mir-135b	0.00197419
Endometriosis	hsa-mir-21	0.00197383
Colonic Neoplasms	hsa-mir-182	0.00197204
Endothelium, Vascular	hsa-mir-155	0.00197196
Adrenocortical Carcinoma	hsa-mir-19b	0.00197148
Medulloblastoma	hsa-mir-222	0.00197137
Carcinoma	hsa-mir-126	0.00197059
Glioma	hsa-mir-205	0.00196982
Melanoma	hsa-mir-99b	0.00196959
Ovarian Neoplasms	hsa-mir-196b	0.00196896
Glioma	hsa-mir-200c	0.00196856
Glioblastoma	hsa-mir-18b	0.0019682
Esophageal Neoplasms	hsa-mir-181a	0.00196725
Retinoblastoma	hsa-mir-221	0.00196721
Stomach Neoplasms	hsa-mir-452	0.00196708
Ovarian Neoplasms	hsa-mir-206	0.00196677
Stomach Neoplasms	hsa-mir-151	0.0019661
Leukemia, Myeloid, Acute	hsa-mir-106b	0.00196484
Medulloblastoma	hsa-mir-146b	0.00196348
Prostatic Neoplasms	hsa-mir-215	0.00196334
Carcinoma, Hepatocellular	hsa-mir-455	0.00196253
Esophageal Neoplasms	hsa-mir-107	0.0019613
Pancreatic Neoplasms	hsa-mir-302a	0.00196119
Urinary Bladder Neoplasms	hsa-mir-20b	0.00196105
Leukemia, Myeloid, Acute	hsa-mir-200a	0.00196089
Carcinoma, Non-Small-Cell Lung	hsa-mir-18b	0.00196063
Patau Syndrome	hsa-mir-155	0.00196014
Carcinoma, Hepatocellular	hsa-mir-663	0.00195901
Thyroid Neoplasms	hsa-let-7c	0.00195849
Adrenocortical Carcinoma	hsa-mir-200a	0.00195786
Adenocarcinoma	hsa-let-7d	0.00195715
Lung Neoplasms	hsa-mir-215	0.00195697
Leukemia, Acute	hsa-mir-155	0.00195675
Prostatic Neoplasms	hsa-mir-372	0.00195625
HEV	hsa-mir-155	0.00195623
Papilary thyroid carcinoma	hsa-mir-155	0.00195623
Carcinoma, Hepatocellular	hsa-mir-363	0.00195598
Endometrial Neoplasms	hsa-mir-143	0.00195586
SIV Infection	hsa-mir-155	0.00195482
Glioblastoma	hsa-mir-92b	0.00195477
Esophageal Neoplasms	hsa-mir-24	0.00195454
Lung Neoplasms	hsa-mir-10a	0.00195419
Head and Neck Neoplasms	hsa-mir-27a	0.00195416
Carcinoma, Non-Small-Cell Lung	hsa-mir-191	0.0019526
Glioblastoma	hsa-mir-135b	0.00194977
Ischemic Preconditioning	hsa-mir-155	0.00194958
Endometrial Neoplasms	hsa-mir-18a	0.00194953
Carcinoma, Non-Small-Cell Lung	hsa-mir-30b	0.00194944
Leukemia, Myeloid, Acute	hsa-mir-125a	0.00194832
Prostatic Neoplasms	hsa-mir-219	0.00194624
Breast Neoplasms	hsa-mir-211	0.00194482
Heart Failure	hsa-let-7g	0.0019438
Lymphoma	hsa-mir-223	0.00194288
Colorectal Neoplasms	hsa-mir-130b	0.00194249
Carcinoma, Non-Small-Cell Lung	hsa-mir-26a	0.00194213
Synapses	hsa-mir-155	0.00194195
Glioma	hsa-mir-199a	0.00194178
Stomach Neoplasms	hsa-mir-488	0.00194098
Glioma	hsa-mir-29c	0.00194064
Ovary Syndrome	hsa-mir-155	0.00193966
Urinary Bladder Neoplasms	hsa-mir-30d	0.00193952
HCMV Infection	hsa-mir-155	0.00193839
Colonic Neoplasms	hsa-mir-199b	0.00193836
Melanoma	hsa-mir-497	0.00193792
Lymphoma, T-Cell	hsa-mir-155	0.00193679
Urinary Bladder Neoplasms	hsa-mir-150	0.00193664
Stomach Neoplasms	hsa-mir-383	0.00193572
Heart Failure	hsa-mir-141	0.00193562
Endometrial Neoplasms	hsa-mir-199a	0.00193532
Stomach Neoplasms	hsa-mir-424	0.00193453
Ovarian Neoplasms	hsa-mir-10a	0.00193397
Neoplasms	hsa-mir-219	0.00193288
Lymphoma, B-Cell	hsa-mir-125b	0.00193237
Prostatic Neoplasms	hsa-mir-367	0.00193185
Carcinoma, Oral	hsa-mir-155	0.00193166
Carcinoma, Hepatocellular	hsa-mir-658	0.00193162
Neoplasms, Squamous Cell	hsa-mir-145	0.00193097
Medulloblastoma	hsa-mir-106b	0.0019309
Prostatic Neoplasms	hsa-mir-92b	0.00192922
Esophageal Neoplasms	hsa-mir-182	0.00192879
Glioma	hsa-mir-34b	0.00192839
Precursor Cell Lymphoblastic Leukemia-Lymphoma	hsa-mir-18a	0.00192699
Endometrial Neoplasms	hsa-mir-218	0.00192645
Carcinoma, Non-Small-Cell Lung	hsa-mir-20b	0.00192472
Precursor Cell Lymphoblastic Leukemia-Lymphoma	hsa-mir-92a	0.00192471
Carcinoma, Hepatocellular	hsa-mir-575	0.00192443
Esophageal Neoplasms	hsa-mir-30c	0.00192383
Urinary Bladder Neoplasms	hsa-mir-191	0.00192379
Carcinoma, Renal Cell	hsa-mir-107	0.00192343
Esophageal Neoplasms	hsa-mir-93	0.00192307
Carcinoma, Renal Cell	hsa-mir-302a	0.001923
Head and Neck Neoplasms	hsa-mir-24	0.00192082
Neuroblastoma	hsa-mir-125b	0.00192052
Urinary Bladder Neoplasms	hsa-mir-132	0.00192012
Erythropoiesis	hsa-mir-155	0.00191988
HCV	hsa-mir-155	0.00191852
Neoplasms	hsa-mir-296	0.00191761
Leukemia, Myeloid, Acute	hsa-mir-146b	0.00191628
Lung Neoplasms	hsa-mir-196b	0.00191488
Gastrointestinal Neoplasms	hsa-mir-34a	0.00191462
Lymphoma	hsa-let-7a	0.00191427
Lung Neoplasms	hsa-mir-302d	0.00191346
Glioma	hsa-let-7e	0.0019114
Urinary Bladder Neoplasms	hsa-mir-18b	0.00191032
Breast Neoplasms	hsa-mir-144	0.00191027
Uterine Cervical Neoplasms	hsa-let-7f	0.00190962
Pancreatic Neoplasms	hsa-mir-219	0.00190888
Endometrial Neoplasms	hsa-mir-92a	0.00190774
Lung Neoplasms	hsa-mir-520b	0.00190748
Glioblastoma	hsa-mir-150	0.00190738
Colonic Neoplasms	hsa-mir-15b	0.00190677
Adenocarcinoma	hsa-mir-214	0.00190624
Heart Failure	hsa-mir-25	0.00190614
Adenocarcinoma	hsa-mir-146a	0.00190512
Esophageal Neoplasms	hsa-mir-18b	0.00190387
Mesothelioma	hsa-mir-34a	0.00190376
Thyroid Neoplasms	hsa-let-7d	0.00190352
Neoplasms, Squamous Cell	hsa-mir-18a	0.00190211
Pancreatic Neoplasms	hsa-mir-92b	0.00190176
Urinary Bladder Neoplasms	hsa-mir-148a	0.00190166
Uterine Cervical Neoplasms	hsa-let-7e	0.00190121
Glioma	hsa-let-7g	0.00190115
Ovarian Neoplasms	hsa-mir-135a	0.00190081
Gastrointestinal Neoplasms	hsa-mir-125b	0.00190068
Precursor Cell Lymphoblastic Leukemia-Lymphoma	hsa-mir-19b	0.00190015
Prostatic Neoplasms	hsa-mir-135a	0.00189977
Thyroid Neoplasms	hsa-mir-16	0.00189842
Neoplasms	hsa-mir-339	0.00189827
Pancreatic Neoplasms	hsa-mir-372	0.00189676
Cryptosporidium	hsa-mir-155	0.00189578
Uterine Cervical Neoplasms	hsa-mir-429	0.00189545
Heart Failure	hsa-mir-181b	0.00189493
Carcinoma, Hepatocellular	hsa-mir-26b	0.00189481
Carcinoma, Hepatocellular	hsa-mir-216b	0.00189153
Colonic Neoplasms	hsa-mir-100	0.00189143
Neoplasms	hsa-mir-124	0.00189137
Colonic Neoplasms	hsa-mir-375	0.00189112
Pancreatic Neoplasms	hsa-mir-335	0.00189084
Carcinoma, Renal Cell	hsa-mir-375	0.00189065
Adenocarcinoma	hsa-let-7c	0.00189028
Ovarian Neoplasms	hsa-mir-98	0.00188884
Endometrial Neoplasms	hsa-mir-16	0.00188882
Melanoma	hsa-mir-133b	0.00188857
Carcinoma, Ehrlich Tumor	hsa-mir-21	0.00188776
Heart Failure	hsa-mir-200a	0.00188773
Esophageal Neoplasms	hsa-mir-199b	0.00188765
Esophageal Neoplasms	hsa-mir-133b	0.00188662
Pancreatic Neoplasms	hsa-mir-135a	0.00188642
Glioblastoma	hsa-mir-429	0.00188638
Mouth Neoplasms	hsa-mir-155	0.00188566
Carcinoma, Renal Cell	hsa-mir-22	0.0018848
Lymphoma, Mantle-Cell	hsa-mir-155	0.00188471
Carcinoma, Hepatocellular	hsa-mir-661	0.00188428
Uterine Cervical Neoplasms	hsa-let-7i	0.00188369
Carcinoma, Non-Small-Cell Lung	hsa-mir-107	0.00188347
SARS Virus	hsa-mir-155	0.00188111
Leukemia, Myeloid, Acute	hsa-mir-214	0.0018802
Carcinoma, Renal Cell	hsa-mir-92b	0.00188004
Glioblastoma	hsa-mir-373	0.00187959
Myocardium	hsa-mir-155	0.00187929
Head and Neck Neoplasms	hsa-mir-106a	0.00187863
Heart Failure	hsa-mir-143	0.00187699
Head and Neck Neoplasms	hsa-mir-182	0.00187642
HIV-1	hsa-mir-155	0.0018755
Ovarian Neoplasms	hsa-mir-27b	0.00187527
Glioblastoma	hsa-mir-199b	0.00187465
Endometriosis	hsa-mir-155	0.0018738
Ependymoma	hsa-mir-21	0.00187327
Lung Neoplasms	hsa-mir-99b	0.00187299
Stomach Neoplasms	hsa-mir-451	0.00187034
Glioma	hsa-mir-101	0.00187001
Carcinoma, Squamous Cell	hsa-mir-429	0.0018697
Melanoma	hsa-mir-151	0.00186928
Aging	hsa-mir-155	0.00186884
Carcinoma, Hepatocellular	hsa-mir-510	0.00186677
PRRSV Infection	hsa-mir-155	0.00186618
Fatty Liver, Non-Alcoholic	hsa-mir-155	0.00186491
Urinary Bladder Neoplasms	hsa-mir-23b	0.00186486
Neoplasms	hsa-mir-23b	0.00186403
Carcinoma, Hepatocellular	hsa-mir-625	0.0018638
Breast Neoplasms	hsa-mir-484	0.00186371
Carcinoma, Hepatocellular	hsa-mir-154	0.00186366
Retinoblastoma	hsa-mir-9	0.00186286
Biliary Tract Neoplasms	hsa-mir-21	0.00186206
Breast Neoplasms	hsa-mir-455	0.00186188
Adenocarcinoma	hsa-let-7b	0.00186094
Heart Failure	hsa-mir-101	0.00185883
Carcinoma, Hepatocellular	hsa-mir-1915	0.00185797
Retinoblastoma	hsa-mir-16	0.00185771
Neoplasms, Squamous Cell	hsa-mir-125b	0.0018577
Head and Neck Neoplasms	hsa-mir-429	0.00185728
Thyroid Neoplasms	hsa-mir-143	0.00185623
Glioma	hsa-mir-141	0.00185457
Medulloblastoma	hsa-mir-181a	0.00185423
Adrenocortical Carcinoma	hsa-mir-19a	0.00185403
Colorectal Neoplasms	hsa-mir-449a	0.00185354
Esophageal Neoplasms	hsa-mir-132	0.0018533
Glioblastoma	hsa-mir-27a	0.00185232
Lymphoma, T-Cell	hsa-mir-21	0.00185171
Colonic Neoplasms	hsa-mir-26a	0.00185155
Lung Neoplasms	hsa-mir-130b	0.00185146
Lymphoma, B-Cell	hsa-mir-221	0.0018511
Breast Neoplasms	hsa-mir-381	0.0018505
Urinary Bladder Neoplasms	hsa-mir-302b	0.00185011
Carcinoma, Squamous Cell	hsa-mir-199b	0.00184965
Endometrial Neoplasms	hsa-mir-203	0.00184939
Carcinoma, Non-Small-Cell Lung	hsa-mir-224	0.00184901
Carcinoma, Hepatocellular	hsa-mir-760	0.00184799
Pancreatic Neoplasms	hsa-mir-23b	0.00184682
Carcinoma, Non-Small-Cell Lung	hsa-mir-195	0.00184668
Gastrointestinal Neoplasms	hsa-mir-17	0.00184665
Leukemia, Myeloid, Acute	hsa-mir-200c	0.00184588
Adrenocortical Carcinoma	hsa-mir-223	0.00184457
Uterine Cervical Neoplasms	hsa-mir-146b	0.00184453
Lymphoma	hsa-mir-222	0.00184427
Neoplasms	hsa-mir-215	0.00184421
Carcinoma, Non-Small-Cell Lung	hsa-mir-22	0.00184394
Carcinoma, Hepatocellular	hsa-mir-382	0.00184386
Esophageal Neoplasms	hsa-mir-195	0.00184378
Medulloblastoma	hsa-mir-210	0.00184375
Urinary Bladder Neoplasms	hsa-mir-204	0.00184339
Colorectal Neoplasms	hsa-mir-212	0.00184225
Prostatic Neoplasms	hsa-mir-30e	0.00184196
Mesothelioma	hsa-mir-145	0.00184147
Glioblastoma	hsa-mir-335	0.00184086
Melanoma	hsa-mir-95	0.00184007
Pancreatic Neoplasms	hsa-mir-98	0.00183959
Carcinoma, Squamous Cell	hsa-mir-30c	0.00183891
Stomach Neoplasms	hsa-mir-181d	0.00183889
Carcinoma, Hepatocellular	hsa-mir-454	0.00183814
Leukemia, Myeloid, Acute	hsa-mir-101	0.00183814
Colorectal Neoplasms	hsa-mir-520b	0.00183726
Carcinoma	hsa-mir-181b	0.00183717
Prostatic Neoplasms	hsa-mir-339	0.00183709
Carcinoma, Squamous Cell	hsa-mir-127	0.00183515
Neoplasms, Glandular and Epithelial	hsa-mir-21	0.00183473
Breast Neoplasms	hsa-mir-363	0.00183376
Esophageal Neoplasms	hsa-mir-30a	0.00183354
Colorectal Neoplasms	hsa-mir-10a	0.00183322
Prostatic Neoplasms	hsa-mir-338	0.00183319
Breast Neoplasms	hsa-mir-154	0.00183224
Medulloblastoma	hsa-mir-15a	0.00183145
Heart Failure	hsa-mir-29c	0.00183132
Precursor Cell Lymphoblastic Leukemia-Lymphoma	hsa-mir-19a	0.00182969
Gastrointestinal Neoplasms	hsa-mir-20a	0.00182902
Carcinoma, Hepatocellular	hsa-mir-4306	0.00182847
Carcinoma, Hepatocellular	hsa-mir-1245b	0.00182773
Carcinoma, Hepatocellular	hsa-mir-1245a	0.00182773
Carcinoma, Hepatocellular	hsa-mir-1323	0.00182773
Carcinoma, Hepatocellular	hsa-mir-1469	0.00182773
Carcinoma, Hepatocellular	hsa-mir-2355	0.00182773
Carcinoma, Hepatocellular	hsa-mir-3130	0.00182773
Carcinoma, Hepatocellular	hsa-mir-3186	0.00182773
Carcinoma, Hepatocellular	hsa-mir-4257	0.00182773
Carcinoma, Hepatocellular	hsa-mir-718	0.00182773
Carcinoma, Hepatocellular	hsa-mir-181	0.00182773
Head and Neck Neoplasms	hsa-mir-30c	0.00182718
Medulloblastoma	hsa-mir-214	0.00182707
Colonic Neoplasms	hsa-mir-130a	0.00182559
Gastrointestinal Neoplasms	hsa-let-7b	0.00182521
Retinoblastoma	hsa-mir-200b	0.00182496
Thyroid Neoplasms	hsa-mir-19a	0.00182486
Pancreatic Neoplasms	hsa-mir-27b	0.00182456
Retinoblastoma	hsa-mir-143	0.00182424
Adrenocortical Carcinoma	hsa-mir-214	0.00182389
Head and Neck Neoplasms	hsa-mir-148a	0.00182353
Endometrial Neoplasms	hsa-mir-34b	0.00182245
Carcinoma, Renal Cell	hsa-mir-10a	0.00182174
Neoplasms	hsa-mir-338	0.00182132
Medulloblastoma	hsa-mir-7	0.00182101
Carcinoma, Renal Cell	hsa-mir-193b	0.00182098
Lymphoma, Mantle-Cell	hsa-mir-21	0.00181988
Carcinoma, Hepatocellular	hsa-mir-1233	0.00181878
Carcinoma, Hepatocellular	hsa-mir-1285	0.00181878
Carcinoma, Hepatocellular	hsa-mir-124a	0.00181878
Leukemia, Lymphocytic, Chronic, B-Cell	hsa-mir-145	0.00181867
Thyroid Neoplasms	hsa-mir-223	0.00181854
Adrenocortical Carcinoma	hsa-let-7i	0.00181848
Carcinoma, Hepatocellular	hsa-mir-551a	0.00181828
Carcinoma, Hepatocellular	hsa-mir-449c	0.00181804
Carcinoma, Hepatocellular	hsa-mir-1228	0.00181804
Carcinoma, Hepatocellular	hsa-mir-518f	0.00181804
Carcinoma, Hepatocellular	hsa-mir-524	0.00181804
Carcinoma, Hepatocellular	hsa-mir-570	0.00181804
Carcinoma, Hepatocellular	hsa-mir-577	0.00181804
Carcinoma, Hepatocellular	hsa-mir-605	0.00181804
Carcinoma, Hepatocellular	hsa-mir-938	0.00181804
Carcinoma, Hepatocellular	hsa-mir-591	0.00181804
Carcinoma, Hepatocellular	hsa-mir-595	0.00181804
Carcinoma, Hepatocellular	hsa-mir-610	0.00181804
Nasopharyngeal Neoplasms	hsa-mir-125b	0.00181711
Carcinoma, Hepatocellular	hsa-mir-1275	0.00181585
Carcinoma, Hepatocellular	hsa-mir-567	0.00181585
Carcinoma, Hepatocellular	hsa-mir-1179	0.00181585
Carcinoma, Hepatocellular	hsa-mir-1273c	0.00181585
Neoplasms, Squamous Cell	hsa-mir-155	0.00181558
Lymphoma, Primary Effusion	hsa-mir-155	0.00181476
Carcinoma, Hepatocellular	hsa-mir-514a	0.00181468
Esophageal Neoplasms	hsa-mir-191	0.00181396
Carcinoma, Squamous Cell	hsa-mir-192	0.00181177
Adenocarcinoma	hsa-mir-34c	0.00181167
Carcinoma, Hepatocellular	hsa-mir-200	0.00181146
Thyroid Neoplasms	hsa-let-7i	0.00181132
Leukemia, Myeloid, Acute	hsa-mir-205	0.00181068
Carcinoma, Hepatocellular	hsa-mir-646	0.00181062
Glioma	hsa-mir-142	0.00180965
Melanoma	hsa-mir-139	0.0018095
Carcinoma, Hepatocellular	hsa-mir-151b	0.00180892
Carcinoma, Hepatocellular	hsa-mir-495	0.00180887
Head and Neck Neoplasms	hsa-mir-150	0.00180841
Leukemia, Lymphocytic, Chronic, B-Cell	hsa-mir-126	0.00180835
Carcinoma, Hepatocellular	hsa-mir-1258	0.00180689
Adenocarcinoma	hsa-let-7i	0.00180683
Uterine Cervical Neoplasms	hsa-let-7g	0.0018066
Leukemia	hsa-mir-221	0.00180646
Lung Neoplasms	hsa-mir-99a	0.00180572
Skin Neoplasms	hsa-mir-21	0.00180447
Carcinoma, Hepatocellular	hsa-mir-603	0.00180422
Carcinoma, Hepatocellular	hsa-mir-544a	0.00180401
Uterine Cervical Neoplasms	hsa-mir-29c	0.00180309
Carcinoma, Hepatocellular	hsa-mir-544b	0.00180254
Head and Neck Neoplasms	hsa-mir-199b	0.0018024
Adrenocortical Carcinoma	hsa-let-7e	0.00180234
Leukemia, B-Cell	hsa-mir-21	0.00180183
Melanoma	hsa-mir-520b	0.00180079
Pancreatic Neoplasms	hsa-mir-30e	0.00180044
Adenocarcinoma	hsa-mir-9	0.00180009
Colonic Neoplasms	hsa-mir-224	0.00179986
Heart Failure	hsa-mir-93	0.00179984
Thyroid Neoplasms	hsa-mir-203	0.00179982
Pancreatic Neoplasms	hsa-mir-137	0.00179885
Thyroid Neoplasms	hsa-mir-34c	0.00179852
Urinary Bladder Neoplasms	hsa-mir-26a	0.00179841
Glioblastoma	hsa-mir-135a	0.00179757
Adenocarcinoma	hsa-mir-141	0.00179744
Leukemia, Myeloid, Acute	hsa-mir-141	0.00179203
Carcinoma, Hepatocellular	hsa-mir-1297	0.001792
Lung Neoplasms	hsa-mir-153	0.00179158
Carcinoma, Hepatocellular	hsa-mir-584	0.00179108
Gastrointestinal Neoplasms	hsa-mir-16	0.00179061
Carcinoma, Hepatocellular	hsa-mir-511	0.00179059
Thyroid Neoplasms	hsa-let-7f	0.00179026
Carcinoma, Hepatocellular	hsa-mir-1471	0.00179009
Pancreatic Neoplasms	hsa-mir-193b	0.0017877
Adrenocortical Carcinoma	hsa-mir-141	0.00178763
Colonic Neoplasms	hsa-mir-194	0.0017876
Osteosarcoma	hsa-let-7a	0.00178648
Myocytes, Cardiac	hsa-mir-155	0.00178603
Carcinoma, Hepatocellular	hsa-mir-552	0.00178515
Thyroid Neoplasms	hsa-mir-199a	0.00178475
Carcinoma, Hepatocellular	hsa-mir-548d	0.00178395
Breast Neoplasms	hsa-mir-382	0.00178365
Nasopharyngeal Neoplasms	hsa-mir-34a	0.00178348
Carcinoma, Hepatocellular	hsa-mir-758	0.00178346
Medulloblastoma	hsa-mir-29a	0.00178335
Carcinoma, Hepatocellular	hsa-mir-1322	0.00178289
Carcinoma, Hepatocellular	hsa-mir-766	0.00178289
Carcinoma, Hepatocellular	hsa-mir-617	0.00178289
Gastrointestinal Neoplasms	hsa-mir-143	0.00178274
Carcinoma, Renal Cell	hsa-mir-133b	0.00178254
Carcinoma, Squamous Cell	hsa-mir-26a	0.00178237
Uterine Cervical Neoplasms	hsa-mir-29b	0.00178198
Uterine Cervical Neoplasms	hsa-mir-223	0.00178154
Carcinoma, Hepatocellular	hsa-mir-621	0.00178146
Carcinoma, Hepatocellular	hsa-mir-518e	0.00178146
Carcinoma, Hepatocellular	hsa-mir-933	0.00178146
Prostatic Neoplasms	hsa-mir-302d	0.00178064
Carcinoma, Hepatocellular	hsa-mir-1299	0.00178046
Esophageal Neoplasms	hsa-mir-15b	0.0017799
Adenocarcinoma	hsa-mir-15a	0.00177984
Carcinoma, Hepatocellular	hsa-mir-1280	0.00177944
Carcinoma	hsa-let-7d	0.0017793
Carcinoma, Hepatocellular	hsa-mir-593	0.00177801
Carcinoma, Hepatocellular	hsa-mir-374a	0.0017779
Carcinoma	hsa-mir-146a	0.00177778
Ovarian Neoplasms	hsa-mir-122	0.00177767
Colonic Neoplasms	hsa-mir-30b	0.00177669
Urinary Bladder Neoplasms	hsa-mir-302c	0.00177664
Medulloblastoma	hsa-let-7b	0.00177658
Colorectal Neoplasms	hsa-mir-424	0.00177622
Prostatic Neoplasms	hsa-mir-10a	0.00177561
Carcinoma, Hepatocellular	hsa-mir-2861	0.00177551
Carcinoma, Hepatocellular	hsa-mir-3196	0.00177551
Carcinoma, Renal Cell	hsa-mir-30e	0.00177509
Nasopharyngeal Neoplasms	hsa-mir-145	0.00177502
Neoplasms, Squamous Cell	hsa-mir-19b	0.00177377
Glioma	hsa-mir-133a	0.00177338
Lymphoma, Primary Effusion	hsa-mir-21	0.00177276
Lung Neoplasms	hsa-mir-28	0.00177153
Glioma	hsa-mir-135b	0.0017715
Carcinoma, Hepatocellular	hsa-mir-1260a	0.0017712
Carcinoma, Hepatocellular	hsa-mir-1305	0.0017712
Carcinoma, Hepatocellular	hsa-mir-3163	0.0017712
Carcinoma, Squamous Cell	hsa-mir-224	0.00177054
Urinary Bladder Neoplasms	hsa-mir-30b	0.00177052
Colonic Neoplasms	hsa-mir-373	0.00177034
Carcinoma, Hepatocellular	hsa-mir-506	0.00177012
Stomach Neoplasms	hsa-mir-197	0.00176979
Carcinoma, Hepatocellular	hsa-mir-630	0.00176973
Leukemia, Myeloid, Acute	hsa-mir-31	0.00176911
Medulloblastoma	hsa-mir-93	0.00176909
Carcinoma, Hepatocellular	hsa-mir-505	0.00176806
Stomach Neoplasms	hsa-mir-211	0.00176785
Adenocarcinoma	hsa-mir-181a	0.00176781
Carcinoma, Hepatocellular	hsa-mir-935	0.00176669
Carcinoma, Hepatocellular	hsa-mir-874	0.00176628
Carcinoma, Hepatocellular	hsa-mir-1254	0.00176627
Carcinoma, Hepatocellular	hsa-mir-3940	0.00176627
Colonic Neoplasms	hsa-mir-124	0.00176627
Adrenocortical Carcinoma	hsa-mir-199a	0.00176567
Head and Neck Neoplasms	hsa-mir-20b	0.00176535
Carcinoma, Hepatocellular	hsa-mir-1256	0.00176493
Carcinoma, Hepatocellular	hsa-mir-1296	0.00176493
Carcinoma, Hepatocellular	hsa-mir-647	0.00176493
Carcinoma, Hepatocellular	hsa-mir-616	0.00176493
Carcinoma, Hepatocellular	hsa-mir-663b	0.00176459
Carcinoma, Renal Cell	hsa-mir-338	0.00176354
Breast Neoplasms	hsa-mir-216b	0.00176206
Urinary Bladder Neoplasms	hsa-mir-124	0.00176185
Ovarian Neoplasms	hsa-mir-32	0.00176182
Carcinoma, Hepatocellular	hsa-mir-1827	0.00176174
Carcinoma, Hepatocellular	hsa-mir-513c	0.00176079
Carcinoma, Hepatocellular	hsa-mir-513b	0.00176079
Carcinoma, Renal Cell	hsa-mir-196b	0.00176064
Glioma	hsa-mir-1	0.0017606
Head and Neck Neoplasms	hsa-mir-15b	0.00176042
Carcinoma, Hepatocellular	hsa-mir-378b	0.00176034
Carcinoma, Hepatocellular	hsa-mir-378d	0.00176034
Carcinoma, Hepatocellular	hsa-mir-378e	0.00176034
Carcinoma, Hepatocellular	hsa-mir-378f	0.00176034
Carcinoma, Hepatocellular	hsa-mir-378i	0.00176031
Carcinoma, Hepatocellular	hsa-mir-378h	0.00176031
Carcinoma, Hepatocellular	hsa-mir-378c	0.00176022
Carcinoma, Hepatocellular	hsa-mir-378g	0.00176002
Carcinoma, Hepatocellular	hsa-mir-33a	0.00175984
Glioma	hsa-mir-148a	0.00175976
Prolactinoma	hsa-mir-21	0.00175826
Urinary Bladder Neoplasms	hsa-mir-373	0.00175823
Urinary Bladder Neoplasms	hsa-mir-302a	0.00175805
Carcinoma, Hepatocellular	hsa-mir-655	0.00175785
Melanoma	hsa-mir-181d	0.00175771
Pituitary Neoplasms	hsa-mir-21	0.00175751
Carcinoma, Hepatocellular	hsa-mir-632	0.00175723
Medulloblastoma	hsa-let-7c	0.00175677
Thyroid Neoplasms	hsa-let-7g	0.00175654
Retinoblastoma	hsa-mir-126	0.00175617
Neuroblastoma	hsa-mir-155	0.00175513
Glioblastoma	hsa-mir-219	0.00175495
Lung Neoplasms	hsa-mir-122	0.00175458
Stomach Neoplasms	hsa-mir-299	0.00175446
Lymphoma	hsa-mir-29b	0.00175428
Carcinoma	hsa-mir-9	0.00175389
Carcinoma	hsa-mir-210	0.00175334
Carcinoma, Hepatocellular	hsa-mir-1227	0.00175327
Carcinoma, Hepatocellular	hsa-mir-1229	0.00175327
Carcinoma, Hepatocellular	hsa-mir-944	0.00175327
Carcinoma, Hepatocellular	hsa-mir-190b	0.00175262
Leukemia, Myeloid, Acute	hsa-mir-210	0.00175238
Carcinoma, Squamous Cell	hsa-mir-302b	0.00175229
Adrenocortical Carcinoma	hsa-mir-182	0.00175202
Endometrial Neoplasms	hsa-mir-223	0.00175182
Carcinoma, Hepatocellular	hsa-mir-1183	0.00175153
Carcinoma, Hepatocellular	hsa-mir-1909	0.00175153
Breast Neoplasms	hsa-mir-216a	0.00175143
Osteosarcoma	hsa-mir-146a	0.00175086
Carcinoma, Hepatocellular	hsa-mir-1181	0.00175072
Carcinoma, Hepatocellular	hsa-mir-3151	0.00175047
Glioma	hsa-mir-30c	0.00175002
Lung Neoplasms	hsa-mir-424	0.00174987
Stomach Neoplasms	hsa-mir-198	0.00174971
Carcinoma, Squamous Cell	hsa-mir-15b	0.00174961
Glioblastoma	hsa-mir-204	0.00174922
Breast Neoplasms	hsa-mir-432	0.00174905
Carcinoma, Hepatocellular	hsa-mir-885	0.00174883
Glioblastoma	hsa-mir-107	0.00174882
Carcinoma, Hepatocellular	hsa-mir-513a	0.0017483
Carcinoma, Renal Cell	hsa-mir-27b	0.00174805
Carcinoma, Non-Small-Cell Lung	hsa-mir-206	0.00174796
Neoplasms	hsa-mir-133b	0.00174737
Carcinoma, Hepatocellular	hsa-mir-33b	0.00174654
Urinary Bladder Neoplasms	hsa-mir-130a	0.00174634
Adenocarcinoma	hsa-mir-199a	0.00174545
Medulloblastoma	hsa-mir-200a	0.00174537
Carcinoma, Hepatocellular	hsa-mir-922	0.00174464
Thyroid Neoplasms	hsa-mir-19b	0.00174425
Leukemia, Myeloid	hsa-mir-21	0.00174419
Carcinoma, Hepatocellular	hsa-mir-519c	0.00174399
Carcinoma, Hepatocellular	hsa-mir-633	0.00174394
Neoplasms, Germ Cell and Embryonal	hsa-mir-21	0.00174355
Esophageal Neoplasms	hsa-mir-302b	0.00174313
Leukemia, Myeloid, Acute	hsa-mir-106a	0.00174278
Mesothelioma	hsa-mir-125b	0.00174204
Breast Neoplasms	hsa-mir-575	0.00174195
Urinary Bladder Neoplasms	hsa-mir-335	0.00174119
Carcinoma, Hepatocellular	hsa-mir-518a	0.00174096
Carcinoma, Non-Small-Cell Lung	hsa-mir-302b	0.00174085
Carcinoma, Hepatocellular	hsa-mir-376b	0.00174053
Carcinoma, Renal Cell	hsa-mir-98	0.00173942
Mouth Neoplasms	hsa-let-7a	0.00173934
Heart Failure	hsa-mir-30d	0.00173932
Breast Neoplasms	hsa-mir-658	0.00173906
Urinary Bladder Neoplasms	hsa-mir-375	0.00173897
Carcinoma, Hepatocellular	hsa-mir-1293	0.00173866
Carcinoma	hsa-mir-15a	0.00173861
Neoplasms	hsa-mir-153	0.00173724
Leukemia, Myeloid, Acute	hsa-mir-1	0.00173709
Carcinoma, Hepatocellular	hsa-mir-302f	0.00173695
Carcinoma, Renal Cell	hsa-mir-302d	0.00173685
Head and Neck Neoplasms	hsa-mir-135b	0.00173671
Medulloblastoma	hsa-let-7i	0.00173658
Carcinoma, Hepatocellular	hsa-mir-664	0.00173636
Adrenocortical Carcinoma	hsa-mir-183	0.0017361
Astrocytoma	hsa-mir-17	0.00173605
Carcinoma, Hepatocellular	hsa-mir-302e	0.00173602
Adenocarcinoma	hsa-mir-218	0.00173522
Carcinoma, Hepatocellular	hsa-mir-147b	0.00173386
Carcinoma, Hepatocellular	hsa-mir-487a	0.00173295
Carcinoma, Hepatocellular	hsa-mir-4792	0.00173245
Carcinoma, Hepatocellular	hsa-mir-642b	0.00173244
Helplessness, Learned	hsa-mir-155	0.00173232
Glioblastoma	hsa-mir-30d	0.0017315
Lymphoma, Large-Cell, Anaplastic	hsa-mir-21	0.00173122
Uterine Cervical Neoplasms	hsa-mir-222	0.00173085
Colon Neoplasms	hsa-mir-21	0.00173056
Breast Neoplasms	hsa-mir-330	0.00173039
Urinary Bladder Neoplasms	hsa-mir-215	0.00173005
Medulloblastoma	hsa-mir-34c	0.00172985
Carcinoma, Hepatocellular	hsa-mir-103b	0.00172985
Adenocarcinoma	hsa-mir-125a	0.00172953
Uterine Cervical Neoplasms	hsa-mir-29a	0.00172946
Breast Neoplasms	hsa-mir-184	0.00172933
Carcinoma, Hepatocellular	hsa-mir-451b	0.00172897
Lymphoma	hsa-mir-9	0.00172888
Urinary Bladder Neoplasms	hsa-mir-22	0.00172869
Carcinoma, Hepatocellular	hsa-mir-369	0.00172862
Carcinoma, Hepatocellular	hsa-mir-564	0.00172862
HBV Infection	hsa-mir-155	0.00172844
Neoplasms	hsa-mir-10a	0.00172843
Mesothelioma	hsa-mir-155	0.00172836
Heart Failure	hsa-mir-127	0.00172828
Colonic Neoplasms	hsa-mir-20b	0.0017279
Adrenocortical Carcinoma	hsa-let-7f	0.00172768
Carcinoma	hsa-mir-181a	0.00172765
Endometriosis	hsa-mir-19b	0.00172761
Carcinoma, Hepatocellular	hsa-mir-504	0.00172707
Carcinoma, Hepatocellular	hsa-mir-627	0.00172595
Carcinoma, Hepatocellular	hsa-mir-582	0.00172595
Carcinoma, Hepatocellular	hsa-mir-635	0.00172595
Carcinoma, Hepatocellular	hsa-mir-566	0.00172595
Carcinoma, Hepatocellular	hsa-mir-589	0.00172595
Carcinoma, Hepatocellular	hsa-mir-619	0.00172595
Carcinoma, Hepatocellular	hsa-mir-1180	0.00172595
Carcinoma, Hepatocellular	hsa-mir-1184	0.00172595
Carcinoma, Hepatocellular	hsa-mir-1273a	0.00172595
Carcinoma, Hepatocellular	hsa-mir-1247	0.00172595
Carcinoma, Hepatocellular	hsa-mir-1972	0.00172595
Carcinoma, Hepatocellular	hsa-mir-592	0.00172579
Carcinoma, Renal Cell	hsa-mir-372	0.00172577
Carcinoma, Hepatocellular	hsa-mir-711	0.00172444
Precursor Cell Lymphoblastic Leukemia-Lymphoma	hsa-mir-16	0.00172427
Esophageal Neoplasms	hsa-mir-224	0.00172355
Urinary Bladder Neoplasms	hsa-mir-193b	0.00172341
Liver Neoplasms	hsa-mir-145	0.0017234
Carcinoma, Squamous Cell	hsa-mir-373	0.00172317
Prostatic Neoplasms	hsa-mir-206	0.00172146
Melanoma	hsa-mir-491	0.00172066
Carcinoma, Hepatocellular	hsa-mir-3179	0.00172012
Carcinoma, Hepatocellular	hsa-mir-550b	0.00172012
Glioblastoma	hsa-mir-30e	0.00171926
Lymphoma	hsa-mir-143	0.00171877
Carcinoma, Hepatocellular	hsa-mir-873	0.00171861
Carcinoma, Hepatocellular	hsa-mir-1266	0.00171729
Adrenocortical Carcinoma	hsa-mir-146b	0.00171722
Carcinoma, Hepatocellular	hsa-mir-941	0.00171708
Neoplasms	hsa-mir-27b	0.00171696
Retinoblastoma	hsa-mir-222	0.00171687
Glioblastoma	hsa-mir-132	0.00171682
Digestive System Neoplasms	hsa-mir-155	0.00171674
Carcinoma, Hepatocellular	hsa-mir-624	0.00171671
Gastrointestinal Neoplasms	hsa-let-7c	0.00171633
Glioblastoma	hsa-mir-100	0.00171605
Carcinoma, Hepatocellular	hsa-mir-571	0.00171559
Carcinoma, Hepatocellular	hsa-mir-519a	0.00171525
Carcinoma, Hepatocellular	hsa-mir-614	0.00171405
Carcinoma, Hepatocellular	hsa-mir-648	0.00171405
Carcinoma, Hepatocellular	hsa-mir-548a	0.00171405
Leukemia, Lymphocytic, Chronic, B-Cell	hsa-let-7a	0.00171401
Carcinoma, Hepatocellular	hsa-mir-545	0.00171385
Leukemia, Myeloid, Acute	hsa-mir-93	0.00171379
Carcinoma, Non-Small-Cell Lung	hsa-mir-194	0.00171349
Carcinoma, Hepatocellular	hsa-mir-599	0.00171349
Carcinoma, Hepatocellular	hsa-mir-641	0.00171306
Carcinoma, Hepatocellular	hsa-mir-1287	0.00171306
Neoplasms	hsa-mir-32	0.00171305
Carcinoma, Hepatocellular	hsa-mir-1236	0.00171252
Carcinoma, Hepatocellular	hsa-mir-3148	0.00171197
Carcinoma, Hepatocellular	hsa-mir-569	0.00171197
Lung Neoplasms	hsa-mir-149	0.00171186
Carcinoma, Hepatocellular	hsa-mir-942	0.00171111
Carcinoma, Non-Small-Cell Lung	hsa-mir-335	0.00171077
Carcinoma, Hepatocellular	hsa-mir-668	0.00171061
Carcinoma, Hepatocellular	hsa-mir-1286	0.00171014
Carcinoma, Hepatocellular	hsa-mir-660	0.00170975
Head and Neck Neoplasms	hsa-mir-191	0.00170971
Stomach Neoplasms	hsa-mir-144	0.00170969
Medulloblastoma	hsa-mir-205	0.00170909
Uterine Cervical Neoplasms	hsa-mir-210	0.00170902
Endometriosis	hsa-mir-19a	0.00170901
Carcinoma, Non-Small-Cell Lung	hsa-mir-219	0.00170876
Glioblastoma	hsa-mir-192	0.00170854
Glioblastoma	hsa-mir-191	0.00170849
Carcinoma, Hepatocellular	hsa-mir-767	0.00170838
Retinoblastoma	hsa-mir-31	0.00170821
Liver Neoplasms	hsa-mir-155	0.00170793
Carcinoma, Basal Cell	hsa-mir-34a	0.00170726
Pancreatic Neoplasms	hsa-mir-367	0.00170718
Carcinoma, Hepatocellular	hsa-mir-329	0.00170696
Carcinoma, Hepatocellular	hsa-mir-189	0.00170695
Glioma	hsa-mir-137	0.00170686
Adenocarcinoma	hsa-mir-146b	0.00170685
Thyroid Neoplasms	hsa-mir-101	0.00170651
Heart Failure	hsa-mir-7	0.00170637
Gastrointestinal Neoplasms	hsa-mir-18a	0.00170594
Carcinoma, Basal Cell	hsa-mir-20a	0.00170583
Carcinoma, Hepatocellular	hsa-mir-548c	0.00170502
Carcinoma, Hepatocellular	hsa-mir-1207	0.00170488
Urinary Bladder Neoplasms	hsa-mir-219	0.00170483
Lymphoma, Primary Effusion	hsa-mir-17	0.00170482
Carcinoma, Squamous Cell	hsa-mir-132	0.00170481
Carcinoma, Hepatocellular	hsa-mir-572	0.00170439
Carcinoma, Hepatocellular	hsa-mir-640	0.00170392
Leukemia, Myeloid, Acute	hsa-mir-218	0.00170314
Thyroid Neoplasms	hsa-mir-29c	0.00170306
Adrenocortical Carcinoma	hsa-mir-205	0.00170266
Breast Neoplasms	hsa-mir-663	0.00170103
Carcinoma, Hepatocellular	hsa-mir-515	0.00170073
Lymphoma	hsa-mir-29a	0.00170009
Thyroid Neoplasms	hsa-mir-214	0.00169994
Trophoblasts	hsa-mir-155	0.00169968
Pancreatic Neoplasms	hsa-mir-339	0.0016986
Glioma	hsa-mir-127	0.00169841
Thyroid Neoplasms	hsa-mir-15a	0.00169822
Endometrial Neoplasms	hsa-mir-214	0.00169811
Adrenocortical Carcinoma	hsa-mir-10b	0.00169805
Rectal Neoplasms	hsa-mir-155	0.00169771
Carcinoma	hsa-let-7c	0.00169768
Carcinoma, Renal Cell	hsa-mir-153	0.00169733
Carcinoma, Hepatocellular	hsa-mir-520a	0.00169715
Carcinoma, Hepatocellular	hsa-mir-520h	0.0016965
Breast Neoplasms	hsa-mir-454	0.00169621
Heart Failure	hsa-mir-20b	0.00169531
Hematologic Neoplasms	hsa-mir-155	0.0016941
Endometrial Neoplasms	hsa-mir-29b	0.00169327
Adenocarcinoma	hsa-let-7f	0.00169306
Esophageal Neoplasms	hsa-mir-194	0.00169278
Neoplasms	hsa-mir-375	0.0016926
Neuroblastoma	hsa-mir-16	0.00169243
Astrocytoma	hsa-mir-34a	0.00169228
Leukemia, Myeloid, Acute	hsa-mir-10b	0.00169152
Glioblastoma	hsa-mir-30b	0.00169113
Carcinoma, Hepatocellular	hsa-mir-642a	0.00169109
Medulloblastoma	hsa-mir-199a	0.00169071
Urinary Bladder Neoplasms	hsa-mir-30a	0.0016907
Head and Neck Neoplasms	hsa-mir-22	0.00169058
Pancreatic Neoplasms	hsa-mir-215	0.00168971
Leukemia-Lymphoma, Adult T-Cell	hsa-mir-21	0.00168886
Adenocarcinoma	hsa-mir-29b	0.00168849
Leukemia	hsa-let-7a	0.00168802
Pancreatic Neoplasms	hsa-mir-99b	0.00168786
Carcinoma, Non-Small-Cell Lung	hsa-mir-302a	0.00168772
Carcinoma, Squamous Cell	hsa-mir-191	0.00168679
Breast Neoplasms	hsa-mir-217	0.00168674
Hodgkin Disease	hsa-mir-125b	0.00168485
Adenocarcinoma	hsa-mir-101	0.00168483
Adrenocortical Carcinoma	hsa-mir-15a	0.00168373
Carcinoma	hsa-let-7b	0.00168358
Carcinoma, Squamous Cell	hsa-mir-92b	0.00168351
Stomach Neoplasms	hsa-mir-23a	0.00168257
Multiple Myeloma	hsa-mir-34a	0.00168252
Stomach Neoplasms	hsa-mir-21	0.00168236
Uterine Cervical Neoplasms	hsa-mir-106b	0.00168146
Testicular Neoplasms	hsa-mir-21	0.0016814
Uterine Cervical Neoplasms	hsa-mir-10b	0.00168125
Colorectal Neoplasms	hsa-mir-452	0.00168066
Medulloblastoma	hsa-mir-29b	0.00168055
Melanoma	hsa-mir-130b	0.00167958
Carcinoma, Hepatocellular	hsa-mir-1246	0.00167929
Heart Failure	hsa-mir-106a	0.00167924
Medulloblastoma	hsa-mir-101	0.00167834
Carcinoma, Hepatocellular	hsa-mir-298	0.00167819
Urinary Bladder Neoplasms	hsa-mir-92b	0.00167791
Waldenstrom Macroglobulinemia	hsa-mir-21	0.00167742
Head and Neck Neoplasms	hsa-mir-30a	0.00167685
Thyroid Neoplasms	hsa-mir-205	0.00167629
Breast Neoplasms	hsa-mir-421	0.00167545
Choriocarcinoma	hsa-mir-21	0.00167512
Lung Neoplasms	hsa-mir-129	0.00167399
Carcinoma	hsa-mir-218	0.00167389
Uterine Cervical Neoplasms	hsa-mir-15a	0.00167375
Carcinoma, Non-Small-Cell Lung	hsa-mir-302c	0.00167366
Pancreatic Neoplasms	hsa-mir-206	0.00167319
Endometriosis	hsa-mir-34a	0.00167265
Retinoblastoma	hsa-mir-146a	0.00167264
Adrenocortical Carcinoma	hsa-mir-9	0.00167229
Glioma	hsa-mir-429	0.00167094
Head and Neck Neoplasms	hsa-mir-132	0.00167082
Mesothelioma	hsa-mir-19a	0.00167036
Neuroblastoma	hsa-mir-221	0.00167018
Endometriosis	hsa-mir-146a	0.00166996
Colonic Neoplasms	hsa-mir-92b	0.0016697
Carcinoma	hsa-mir-223	0.00166964
Carcinoma, Hepatocellular	hsa-mir-675	0.00166942
Stomach Neoplasms	hsa-mir-96	0.00166919
Adrenocortical Carcinoma	hsa-mir-218	0.00166811
Medulloblastoma	hsa-mir-25	0.00166775
Endometrial Neoplasms	hsa-mir-101	0.00166767
Melanoma	hsa-mir-181c	0.00166741
Pancreatic Neoplasms	hsa-mir-302d	0.00166706
Head and Neck Neoplasms	hsa-mir-26a	0.00166637
Neoplasms	hsa-mir-99b	0.00166547
Ovarian Neoplasms	hsa-mir-137	0.00166501
Carcinoma, Hepatocellular	hsa-mir-185	0.00166465
Medulloblastoma	hsa-mir-29c	0.00166431
Leukemia, Myeloid, Acute	hsa-mir-182	0.001664
Oligodendroglioma	hsa-mir-21	0.00166391
Adenocarcinoma	hsa-mir-29c	0.00166336
Leukemia	hsa-mir-126	0.00166325
Breast Neoplasms	hsa-mir-33a	0.001663
Pancreatic Neoplasms	hsa-mir-497	0.0016625
Head and Neck Neoplasms	hsa-mir-192	0.00166132
Esophageal Neoplasms	hsa-mir-20b	0.00166131
Medulloblastoma	hsa-let-7f	0.00166125
Carcinoma, Squamous Cell	hsa-mir-135a	0.0016609
Ovarian Neoplasms	hsa-mir-130b	0.00166047
Lymphoma	hsa-let-7b	0.00166019
Heart Failure	hsa-mir-206	0.0016601
Lung Neoplasms	hsa-mir-449a	0.00165965
Odontogenic Tumors	hsa-mir-21	0.00165964
Mouth Neoplasms	hsa-mir-145	0.00165937
Uterine Cervical Neoplasms	hsa-mir-101	0.00165908
Gastric Neoplasms	hsa-mir-21	0.00165869
Burkitt Lymphoma	hsa-mir-21	0.00165801
Carcinoma, Non-Small-Cell Lung	hsa-mir-204	0.00165721
Carcinoma, Hepatocellular	hsa-mir-384	0.00165703
Endometrial Neoplasms	hsa-mir-29a	0.00165657
Adrenocortical Carcinoma	hsa-mir-29c	0.00165648
Prostatic Neoplasms	hsa-mir-137	0.00165448
Uterine Cervical Neoplasms	hsa-mir-125a	0.00165377
Carcinoma, Hepatocellular	hsa-mir-331	0.00165313
Medulloblastoma	hsa-let-7e	0.00165138
Osteosarcoma	hsa-let-7b	0.00165039
Gastrointestinal Neoplasms	hsa-mir-199a	0.00164971
Neoplasms, Squamous Cell	hsa-mir-16	0.00164936
Carcinoma, Hepatocellular	hsa-mir-1302	0.00164866
Stomach Neoplasms	hsa-mir-376a	0.00164858
Thyroid Neoplasms	hsa-mir-210	0.00164824
Carcinoma, Non-Small-Cell Lung	hsa-mir-373	0.00164767
Pancreatic Neoplasms	hsa-mir-140	0.00164742
Adrenocortical Carcinoma	hsa-mir-34c	0.00164582
Carcinoma, Hepatocellular	hsa-mir-628	0.00164507
Esophageal Neoplasms	hsa-mir-124	0.00164409
Carcinoma	hsa-mir-34c	0.00164354
Esophageal Neoplasms	hsa-mir-302c	0.00164347
Carcinoma, Hepatocellular	hsa-mir-671	0.00164335
Breast Neoplasms	hsa-mir-33b	0.00164271
Colonic Neoplasms	hsa-mir-135a	0.00164208
Colorectal Neoplasms	hsa-mir-151	0.00164204
Retinoblastoma	hsa-mir-146b	0.00164195
Colonic Neoplasms	hsa-mir-372	0.00164122
Carcinoma, Hepatocellular	hsa-mir-519b	0.00164042
Urinary Bladder Neoplasms	hsa-mir-367	0.00164012
Carcinoma, Squamous Cell	hsa-mir-302c	0.00163925
Adenocarcinoma	hsa-let-7e	0.00163887
Uterine Cervical Neoplasms	hsa-mir-93	0.00163885
Eosinophilic Esophagitis	hsa-mir-155	0.0016388
Adenocarcinoma	hsa-mir-7	0.00163873
Gastrointestinal Neoplasms	hsa-mir-223	0.00163866
Melanoma	hsa-mir-451	0.0016385
Leukemia, Myeloid, Acute	hsa-mir-183	0.00163756
Medulloblastoma	hsa-mir-200c	0.00163686
Glioma	hsa-mir-150	0.00163662
Digestive System Neoplasms	hsa-mir-145	0.00163643
Melanoma	hsa-mir-140	0.00163628
Colorectal Neoplasms	hsa-mir-383	0.00163604
Adrenocortical Carcinoma	hsa-let-7g	0.0016358
Carcinoma, Hepatocellular	hsa-mir-720	0.00163535
Breast Neoplasms	hsa-mir-2110	0.00163481
Breast Neoplasms	hsa-mir-1303	0.00163481
Carcinoma, Squamous Cell	hsa-mir-23b	0.00163356
Carcinoma, Squamous Cell	hsa-mir-135b	0.00163354
Adenocarcinoma	hsa-mir-1	0.00163339
Osteosarcoma	hsa-mir-126	0.00163272
Endometrial Neoplasms	hsa-mir-10b	0.00163167
Urinary Bladder Neoplasms	hsa-mir-135a	0.00163166
Glioblastoma	hsa-mir-194	0.00163097
Head and Neck Neoplasms	hsa-mir-124	0.00163086
Colorectal Neoplasms	hsa-mir-449b	0.00163063
Carcinoma, Hepatocellular	hsa-mir-708	0.00163058
Head and Neck Neoplasms	hsa-mir-224	0.00163009
Head and Neck Neoplasms	hsa-mir-30d	0.00163001
Colorectal Neoplasms	hsa-mir-488	0.00162981
Adenocarcinoma	hsa-mir-29a	0.0016298
Lung Neoplasms	hsa-mir-342	0.00162942
Breast Neoplasms	hsa-mir-331	0.00162899
Melanoma	hsa-mir-212	0.00162875
Breast Neoplasms	hsa-mir-744	0.00162764
Adrenocortical Carcinoma	hsa-mir-181b	0.00162761
Uterine Cervical Neoplasms	hsa-mir-183	0.00162686
Heart Failure	hsa-mir-203	0.00162681
Carcinoma, Basal Cell	hsa-mir-92a	0.00162598
Carcinoma, Hepatocellular	hsa-mir-422a	0.00162582
Carcinoma, Hepatocellular	hsa-mir-323a	0.00162569
Carcinoma, Hepatocellular	hsa-mir-509	0.00162486
Endometrial Neoplasms	hsa-mir-222	0.00162364
Meningioma	hsa-mir-21	0.00162353
Sarcoma, Kaposi	hsa-mir-21	0.00162322
Melanoma	hsa-mir-28	0.00162232
Lymphoma, Primary Effusion	hsa-mir-20a	0.00162224
Breast Neoplasms	hsa-mir-1271	0.00162183
Retinoblastoma	hsa-mir-183	0.00162177
Glioblastoma	hsa-mir-193b	0.0016215
Leukemia, Myeloid, Acute	hsa-mir-7	0.00162073
Endometriosis	hsa-mir-18a	0.00162063
Carcinoma, Hepatocellular	hsa-mir-374b	0.00162022
Medulloblastoma	hsa-mir-20b	0.0016202
Carcinoma	hsa-mir-203	0.00162005
Stomach Neoplasms	hsa-mir-455	0.00162002
Adrenocortical Carcinoma	hsa-mir-34b	0.00162002
Adrenocortical Carcinoma	hsa-mir-125a	0.00161986
Glioblastoma	hsa-mir-338	0.00161891
Carcinoma, Non-Small-Cell Lung	hsa-mir-23b	0.00161798
Breast Neoplasms	hsa-mir-376b	0.00161791
Prostatic Neoplasms	hsa-mir-497	0.00161751
HPV Infection	hsa-mir-155	0.00161744
Hodgkin Disease	hsa-mir-34a	0.00161734
Head and Neck Neoplasms	hsa-mir-133b	0.00161631
Breast Neoplasms	hsa-mir-532	0.00161601
Astrocytoma	hsa-mir-20a	0.0016159
Colonic Neoplasms	hsa-mir-335	0.00161486
Lymphoma	hsa-let-7d	0.00161457
Endometrial Neoplasms	hsa-mir-7	0.00161447
Carcinoma, Hepatocellular	hsa-mir-507	0.00161389
Carcinoma, Hepatocellular	hsa-mir-297	0.00161331
Leukemia, Myeloid, Acute	hsa-mir-195	0.00161188
Breast Neoplasms	hsa-mir-660	0.00161147
Carcinoma, Hepatocellular	hsa-mir-638	0.00161115
Carcinoma, Hepatocellular	hsa-mir-410	0.0016103
Carcinoma	hsa-mir-93	0.00160996
Urinary Bladder Neoplasms	hsa-mir-339	0.00160949
Ovarian Neoplasms	hsa-mir-497	0.00160941
Breast Neoplasms	hsa-mir-520e	0.00160893
Retinoblastoma	hsa-mir-15a	0.0016085
Neuroblastoma	hsa-mir-143	0.00160797
Breast Neoplasms	hsa-mir-1249	0.00160763
Adrenocortical Carcinoma	hsa-mir-31	0.00160598
Colonic Neoplasms	hsa-mir-30d	0.00160593
Carcinoma, Hepatocellular	hsa-mir-300	0.0016059
Gastrointestinal Neoplasms	hsa-mir-92a	0.00160576
Breast Neoplasms	hsa-mir-551a	0.00160562
Breast Neoplasms	hsa-mir-518f	0.00160559
Breast Neoplasms	hsa-mir-1228	0.00160559
Breast Neoplasms	hsa-mir-449c	0.00160559
Breast Neoplasms	hsa-mir-524	0.00160559
Breast Neoplasms	hsa-mir-591	0.00160559
Breast Neoplasms	hsa-mir-605	0.00160559
Breast Neoplasms	hsa-mir-938	0.00160559
Breast Neoplasms	hsa-mir-570	0.00160559
Breast Neoplasms	hsa-mir-577	0.00160559
Breast Neoplasms	hsa-mir-595	0.00160559
Breast Neoplasms	hsa-mir-610	0.00160559
Breast Neoplasms	hsa-mir-508	0.0016051
Urinary Bladder Neoplasms	hsa-mir-372	0.00160491
Leukemia, Lymphocytic, Chronic, B-Cell	hsa-let-7b	0.00160455
Glioblastoma	hsa-mir-383	0.00160451
Carcinoma	hsa-mir-106a	0.00160434
Carcinoma	hsa-mir-25	0.00160337
Colonic Neoplasms	hsa-mir-302a	0.00160334
Carcinoma, Squamous Cell	hsa-mir-335	0.0016032
Gastrointestinal Neoplasms	hsa-mir-19a	0.00160269
Colonic Neoplasms	hsa-mir-302c	0.0016026
Atrial Fibrillation	hsa-mir-21	0.00160216
Nerve Sheath Neoplasms	hsa-mir-21	0.00160132
Carcinoma, Hepatocellular	hsa-mir-548b	0.00160047
Carcinoma, Non-Small-Cell Lung	hsa-mir-338	0.00159947
Glioma	hsa-mir-26a	0.00159938
Heart Failure	hsa-mir-191	0.00159927
Breast Neoplasms	hsa-mir-92	0.00159888
Breast Neoplasms	hsa-mir-1231	0.00159888
Breast Neoplasms	hsa-mir-1234	0.00159888
Breast Neoplasms	hsa-mir-1301	0.00159888
Breast Neoplasms	hsa-mir-500b	0.00159888
Breast Neoplasms	hsa-mir-517c	0.00159888
Breast Neoplasms	hsa-mir-522	0.00159888
Breast Neoplasms	hsa-mir-527	0.00159888
Breast Neoplasms	hsa-mir-1202	0.00159888
Breast Neoplasms	hsa-mir-26	0.00159888
Carcinoma, Hepatocellular	hsa-mir-523	0.00159854
Endometrial Neoplasms	hsa-mir-196a	0.00159839
Neoplasms, Squamous Cell	hsa-mir-19a	0.00159822
Breast Neoplasms	hsa-mir-138	0.00159781
Esophageal Neoplasms	hsa-mir-122	0.0015976
Head and Neck Neoplasms	hsa-mir-30b	0.00159619
Melanoma	hsa-mir-129	0.00159597
Carcinoma	hsa-mir-125a	0.00159568
Uterine Cervical Neoplasms	hsa-mir-30c	0.00159551
Breast Neoplasms	hsa-mir-517a	0.00159544
Gastrointestinal Neoplasms	hsa-mir-29a	0.00159504
Leukemia, Myeloid, Acute	hsa-mir-18b	0.00159503
Breast Neoplasms	hsa-mir-646	0.00159438
Prostatic Neoplasms	hsa-mir-139	0.001594
Gastrointestinal Neoplasms	hsa-let-7f	0.00159392
Glioma	hsa-mir-199b	0.00159301
Carcinoma, Non-Small-Cell Lung	hsa-mir-92b	0.00159296
Melanoma	hsa-mir-424	0.0015926
Lymphoma	hsa-mir-106b	0.00159248
Colonic Neoplasms	hsa-mir-338	0.0015914
Esophageal Neoplasms	hsa-mir-335	0.0015911
Leukemia, Myeloid, Acute	hsa-mir-20b	0.00159101
Endometriosis	hsa-mir-29b	0.00159098
Lung Neoplasms	hsa-mir-139	0.00159095
Lymphoma, B-Cell	hsa-mir-223	0.00159065
Liver Neoplasms	hsa-let-7a	0.00159053
Carcinoma, Non-Small-Cell Lung	hsa-mir-32	0.00159045
Retinoblastoma	hsa-mir-218	0.00159021
Retinoblastoma	hsa-mir-106b	0.00159015
Breast Neoplasms	hsa-mir-1280	0.00158987
Breast Neoplasms	hsa-mir-760	0.00158981
Carcinoma, Hepatocellular	hsa-mir-377	0.00158964
Carcinoma, Hepatocellular	hsa-mir-136	0.00158935
Glioblastoma	hsa-mir-339	0.00158933
Breast Neoplasms	hsa-mir-512	0.00158894
Breast Neoplasms	hsa-mir-642a	0.00158887
Breast Neoplasms	hsa-mir-544a	0.00158886
Carcinoma, Basal Cell	hsa-mir-155	0.00158864
Endometrial Neoplasms	hsa-mir-125a	0.00158859
Retinoblastoma	hsa-mir-181a	0.00158859
Carcinoma, Hepatocellular	hsa-mir-337	0.00158816
Glioblastoma	hsa-mir-215	0.00158816
Leukemia, Lymphocytic, Chronic, B-Cell	hsa-mir-143	0.00158717
Breast Neoplasms	hsa-mir-1297	0.00158705
Breast Neoplasms	hsa-mir-544b	0.00158697
Mouth Neoplasms	hsa-mir-17	0.00158648
Medulloblastoma	hsa-mir-34b	0.00158526
Gastrointestinal Neoplasms	hsa-mir-141	0.0015847
Colorectal Neoplasms	hsa-mir-494	0.00158466
Breast Neoplasms	hsa-mir-511	0.00158447
Stomach Neoplasms	hsa-mir-301b	0.00158414
Nasopharyngeal Neoplasms	hsa-mir-221	0.00158407
Adrenocortical Carcinoma	hsa-mir-29b	0.0015836
Breast Neoplasms	hsa-mir-1179	0.00158326
Breast Neoplasms	hsa-mir-1273c	0.00158326
Breast Neoplasms	hsa-mir-1275	0.00158326
Breast Neoplasms	hsa-mir-567	0.00158326
Stomach Neoplasms	hsa-mir-510	0.00158307
Urinary Bladder Neoplasms	hsa-mir-338	0.0015828
Colonic Neoplasms	hsa-mir-122	0.00158195
Medulloblastoma	hsa-mir-142	0.00158155
Prostatic Neoplasms	hsa-mir-95	0.00158128
Breast Neoplasms	hsa-mir-498	0.0015807
Mesothelioma	hsa-mir-16	0.00158017
Prostatic Neoplasms	hsa-mir-449b	0.00158015
Neuroblastoma	hsa-mir-181b	0.00157998
Breast Neoplasms	hsa-mir-323b	0.00157994
Adenocarcinoma	hsa-mir-100	0.00157926
Pancreatic Neoplasms	hsa-mir-129	0.00157923
Breast Neoplasms	hsa-mir-1299	0.00157897
Leukemia	hsa-mir-222	0.00157894
Carcinoma, Hepatocellular	hsa-mir-622	0.00157892
Thyroid Neoplasms	hsa-mir-29a	0.00157878
Carcinoma	hsa-mir-34b	0.00157868
Carcinoma, Renal Cell	hsa-mir-32	0.00157847
Urinary Bladder Neoplasms	hsa-mir-122	0.00157806
Carcinoma, Hepatocellular	hsa-mir-525	0.00157797
Adenocarcinoma	hsa-let-7g	0.00157769
Breast Neoplasms	hsa-mir-300	0.00157738
Breast Neoplasms	hsa-mir-499b	0.00157718
Esophageal Neoplasms	hsa-mir-373	0.00157636
Colonic Neoplasms	hsa-mir-219	0.0015757
Liver Neoplasms	hsa-mir-221	0.00157551
Urinary Bladder Neoplasms	hsa-mir-206	0.00157541
Lung Neoplasms	hsa-mir-449b	0.00157509
Carcinoma	hsa-mir-199a	0.00157499
Breast Neoplasms	hsa-mir-337	0.00157488
Adrenocortical Carcinoma	hsa-mir-101	0.00157442
Thyroid Neoplasms	hsa-mir-29b	0.00157442
Prostatic Neoplasms	hsa-mir-520b	0.00157349
Adrenocortical Carcinoma	hsa-mir-106a	0.00157336
Breast Neoplasms	hsa-mir-492	0.00157332
Breast Neoplasms	hsa-mir-190a	0.00157318
Prostate Neoplasms	hsa-mir-21	0.00157262
Breast Neoplasms	hsa-mir-361	0.00157231
Glioma	hsa-mir-10a	0.0015714
Adrenocortical Carcinoma	hsa-mir-25	0.00157135
Breast Neoplasms	hsa-mir-526b	0.00157118
Nasopharyngeal Neoplasms	hsa-mir-126	0.00157106
Multiple Myeloma	hsa-mir-146a	0.00157057
Medulloblastoma	hsa-mir-141	0.00157052
Mouth Neoplasms	hsa-mir-34a	0.00157051
Leukemia, Myeloid, Acute	hsa-mir-30a	0.0015705
Uterine Cervical Neoplasms	hsa-mir-127	0.00156975
Breast Neoplasms	hsa-mir-105	0.0015695
Hemangiosarcoma	hsa-mir-21	0.00156907
Retinoblastoma	hsa-mir-106a	0.00156904
Osteosarcoma	hsa-mir-106b	0.00156882
Head and Neck Neoplasms	hsa-mir-194	0.00156856
Carcinoma, Renal Cell	hsa-mir-449a	0.00156852
Uterine Cervical Neoplasms	hsa-mir-133a	0.00156829
Breast Neoplasms	hsa-mir-502	0.00156821
Carcinoma	hsa-let-7f	0.00156812
Lymphoma, B-Cell	hsa-let-7a	0.00156768
Urinary Bladder Neoplasms	hsa-mir-30e	0.0015676
Colonic Neoplasms	hsa-mir-206	0.00156735
Breast Neoplasms	hsa-mir-1296	0.00156712
Breast Neoplasms	hsa-mir-616	0.00156712
Breast Neoplasms	hsa-mir-647	0.00156712
Breast Neoplasms	hsa-mir-1256	0.00156712
Medulloblastoma	hsa-mir-195	0.00156697
Carcinoma, Basal Cell	hsa-mir-125b	0.00156653
Gastrointestinal Neoplasms	hsa-mir-34c	0.00156568
Adrenocortical Carcinoma	hsa-mir-181a	0.00156559
Liver Neoplasms	hsa-mir-34a	0.00156553
Mouth Neoplasms	hsa-mir-146a	0.00156499
Breast Neoplasms	hsa-mir-514a	0.00156499
Breast Neoplasms	hsa-mir-1254	0.00156497
Breast Neoplasms	hsa-mir-3940	0.00156497
Carcinoma, Squamous Cell	hsa-mir-107	0.00156457
Prostatic Neoplasms	hsa-mir-140	0.00156415
Breast Neoplasms	hsa-mir-650	0.00156357
Urinary Bladder Neoplasms	hsa-mir-153	0.00156341
Endometriosis	hsa-mir-92a	0.00156319
Carcinoma, Squamous Cell	hsa-mir-30b	0.00156265
Endometrial Neoplasms	hsa-mir-15a	0.00156264
Carcinoma, Squamous Cell	hsa-mir-204	0.00156238
Medulloblastoma	hsa-let-7g	0.00156238
Neoplasms, Squamous Cell	hsa-let-7a	0.00156201
Osteosarcoma	hsa-mir-222	0.00156195
Pancreatic Neoplasms	hsa-mir-153	0.00156153
Leukemia, Lymphocytic, Chronic, B-Cell	hsa-mir-9	0.00156144
Carcinoma, Hepatocellular	hsa-mir-520f	0.00156129
Carcinoma, Hepatocellular	hsa-mir-520g	0.00156129
Stomach Neoplasms	hsa-mir-423	0.00156109
Carcinoma	hsa-mir-29c	0.00156093
Breast Neoplasms	hsa-mir-642b	0.0015607
Lymphoma, B-Cell	hsa-mir-222	0.00156058
Breast Neoplasms	hsa-mir-603	0.00156049
Stomach Neoplasms	hsa-mir-454	0.00155954
Stomach Neoplasms	hsa-mir-425	0.00155946
Carcinoma, Non-Small-Cell Lung	hsa-mir-296	0.00155927
Lymphoma	hsa-let-7c	0.00155901
Colorectal Neoplasms	hsa-mir-181c	0.00155901
Thyroid Neoplasms	hsa-mir-181b	0.00155886
Uterine Cervical Neoplasms	hsa-mir-142	0.00155846
Carcinoma	hsa-mir-29a	0.0015581
Breast Neoplasms	hsa-mir-518e	0.00155791
Breast Neoplasms	hsa-mir-621	0.00155791
Breast Neoplasms	hsa-mir-933	0.00155791
Lymphoma	hsa-mir-181b	0.00155764
Retinoblastoma	hsa-mir-214	0.0015572
Neuroblastoma	hsa-let-7a	0.00155707
Nasopharyngeal Neoplasms	hsa-mir-92a	0.00155654
Breast Neoplasms	hsa-mir-136	0.00155637
Stomach Neoplasms	hsa-mir-216b	0.00155533
Colonic Neoplasms	hsa-mir-27b	0.00155516
Carcinoma, Renal Cell	hsa-mir-497	0.00155387
Neoplasms, Squamous Cell	hsa-mir-143	0.00155386
Breast Neoplasms	hsa-mir-1233	0.0015537
Breast Neoplasms	hsa-mir-124a	0.0015537
Breast Neoplasms	hsa-mir-1285	0.0015537
Prostatic Neoplasms	hsa-mir-383	0.00155344
Breast Neoplasms	hsa-mir-663b	0.00155276
Breast Neoplasms	hsa-mir-593	0.00155271
Ovarian Neoplasms	hsa-mir-520b	0.00155263
Carcinoma, Renal Cell	hsa-mir-140	0.00155162
Lymphoma, Primary Effusion	hsa-mir-18a	0.00155137
Breast Neoplasms	hsa-mir-302e	0.00155135
Hodgkin Disease	hsa-mir-221	0.00155117
Mesothelioma	hsa-mir-221	0.00155103
Uterine Cervical Neoplasms	hsa-mir-148a	0.00155102
Stomach Neoplasms	hsa-mir-330	0.00155076
Stomach Neoplasms	hsa-mir-484	0.00155049
Heart Failure	hsa-mir-100	0.00155008
Astrocytoma	hsa-mir-145	0.00154916
Nasopharyngeal Neoplasms	hsa-mir-19a	0.00154878
Sarcoma	hsa-mir-21	0.00154863
Carcinoma, Hepatocellular	hsa-mir-325	0.00154847
Ovarian Neoplasms	hsa-mir-95	0.00154785
Breast Neoplasms	hsa-mir-552	0.00154704
Breast Neoplasms	hsa-mir-302f	0.00154697
Rectal Neoplasms	hsa-mir-126	0.00154685
Endometrial Neoplasms	hsa-mir-181a	0.00154634
Carcinoma, Hepatocellular	hsa-mir-371a	0.00154603
Carcinoma, Hepatocellular	hsa-mir-574	0.00154586
Medulloblastoma	hsa-mir-137	0.00154531
Melanoma	hsa-mir-449a	0.00154515
Carcinoma, Squamous Cell	hsa-mir-194	0.00154426
Adrenocortical Carcinoma	hsa-mir-29a	0.00154401
Leukemia, Myeloid, Acute	hsa-mir-133a	0.00154348
Prostatic Neoplasms	hsa-mir-28	0.00154332
Esophageal Neoplasms	hsa-mir-137	0.0015431
Breast Neoplasms	hsa-mir-758	0.00154271
Glioblastoma	hsa-mir-375	0.00154256
Breast Neoplasms	hsa-mir-1322	0.0015421
Breast Neoplasms	hsa-mir-766	0.0015421
Breast Neoplasms	hsa-mir-617	0.0015421
Thyroid Neoplasms	hsa-mir-196a	0.00154198
Breast Neoplasms	hsa-mir-633	0.00154166
Ovarian Neoplasms	hsa-mir-149	0.00154128
Breast Neoplasms	hsa-mir-1227	0.00154067
Breast Neoplasms	hsa-mir-944	0.00154067
Breast Neoplasms	hsa-mir-1229	0.00154067
Carcinoma	hsa-mir-141	0.00154036
Astrocytoma	hsa-mir-18a	0.00154003
Breast Neoplasms	hsa-mir-297	0.00153984
Colorectal Neoplasms	hsa-mir-451	0.00153983
Endometriosis	hsa-mir-9	0.00153969
Head and Neck Neoplasms	hsa-mir-335	0.00153819
Carcinoma	hsa-mir-29b	0.00153763
Multiple Myeloma	hsa-mir-145	0.0015368
Carcinoma, Renal Cell	hsa-mir-137	0.00153656
Breast Neoplasms	hsa-mir-1266	0.00153654
Breast Neoplasms	hsa-mir-507	0.00153504
Colonic Neoplasms	hsa-mir-98	0.00153419
Breast Neoplasms	hsa-mir-518a	0.00153394
Endometriosis	hsa-mir-205	0.00153341
Carcinoma, Hepatocellular	hsa-mir-601	0.00153317
Leukemia	hsa-mir-181b	0.00153289
Adenocarcinoma	hsa-mir-142	0.00153253
Neoplasms	hsa-mir-497	0.00153218
Breast Neoplasms	hsa-mir-548d	0.00153214
Leukemia-Lymphoma, Adult T-Cell	hsa-mir-125b	0.00153138
Breast Neoplasms	hsa-mir-1260a	0.00153106
Breast Neoplasms	hsa-mir-1305	0.00153106
Breast Neoplasms	hsa-mir-3163	0.00153106
Liver Neoplasms	hsa-mir-126	0.00153074
Colorectal Neoplasms	hsa-mir-181d	0.00153037
Medulloblastoma	hsa-mir-24	0.00153019
Osteosarcoma	hsa-mir-200b	0.00153005
Colonic Neoplasms	hsa-mir-99a	0.00152971
Breast Neoplasms	hsa-mir-377	0.00152926
Breast Neoplasms	hsa-mir-630	0.00152908
Uterine Cervical Neoplasms	hsa-mir-25	0.00152892
Carcinoma, Non-Small-Cell Lung	hsa-mir-137	0.00152797
Lymphoma, Primary Effusion	hsa-mir-92a	0.0015275
Esophageal Neoplasms	hsa-mir-30d	0.00152735
Melanoma	hsa-mir-449b	0.00152734
Thyroid Neoplasms	hsa-mir-125a	0.00152726
Neoplasms	hsa-mir-95	0.00152723
Breast Neoplasms	hsa-mir-451b	0.00152721
Breast Neoplasms	hsa-mir-523	0.00152679
Thyroid Neoplasms	hsa-mir-106b	0.00152675
Colorectal Neoplasms	hsa-mir-197	0.00152633
Liver Neoplasms	hsa-mir-200c	0.00152603
Gastrointestinal Neoplasms	hsa-let-7e	0.00152592
Lung Neoplasms	hsa-mir-452	0.00152548
Urinary Bladder Neoplasms	hsa-mir-98	0.00152524
Endometrial Neoplasms	hsa-mir-93	0.00152445
Liver Neoplasms	hsa-mir-200b	0.00152438
Breast Neoplasms	hsa-mir-370	0.00152436
Breast Neoplasms	hsa-mir-513c	0.0015239
Breast Neoplasms	hsa-mir-513b	0.0015239
Heart Failure	hsa-mir-194	0.00152382
Lung Neoplasms	hsa-mir-181d	0.00152339
Endometrial Neoplasms	hsa-mir-375	0.00152296
Nasopharyngeal Neoplasms	hsa-mir-200b	0.00152293
Breast Neoplasms	hsa-mir-378g	0.00152269
Breast Neoplasms	hsa-mir-378b	0.00152257
Breast Neoplasms	hsa-mir-378d	0.00152257
Breast Neoplasms	hsa-mir-378e	0.00152257
Breast Neoplasms	hsa-mir-378f	0.00152257
Breast Neoplasms	hsa-mir-378h	0.0015225
Breast Neoplasms	hsa-mir-378i	0.0015225
Breast Neoplasms	hsa-mir-378c	0.00152246
Breast Neoplasms	hsa-mir-935	0.00152193
Carcinoma, Squamous Cell	hsa-mir-22	0.00152162
Lung Neoplasms	hsa-mir-383	0.00152133
Prostatic Neoplasms	hsa-mir-424	0.0015212
Lung Neoplasms	hsa-mir-491	0.00152108
Breast Neoplasms	hsa-mir-487a	0.0015209
Lymphoma, Primary Effusion	hsa-mir-19b	0.0015203
Muscular Disorders, Atrophic	hsa-mir-206	0.00152017
Leukemia, Myeloid, Acute	hsa-mir-429	0.00151995
Hepatoblastoma	hsa-mir-21	0.00151979
Leukemia, Lymphocytic, Chronic, B-Cell	hsa-let-7c	0.00151959
Mycosis Fungoides	hsa-mir-21	0.00151957
Adenocarcinoma	hsa-mir-24	0.00151947
Breast Neoplasms	hsa-mir-500a	0.00151913
Stomach Neoplasms	hsa-mir-154	0.00151889
Retinoblastoma	hsa-mir-7	0.00151875
Carcinoma, Hepatocellular	hsa-mir-521	0.00151867
Breast Neoplasms	hsa-mir-664	0.00151836
Breast Neoplasms	hsa-mir-520f	0.00151808
Breast Neoplasms	hsa-mir-520g	0.00151808
Ovarian Neoplasms	hsa-mir-139	0.00151751
Stomach Neoplasms	hsa-mir-381	0.00151728
Carcinoma, Hepatocellular	hsa-mir-128	0.00151683
Adrenocortical Carcinoma	hsa-mir-93	0.00151643
Breast Neoplasms	hsa-mir-3151	0.00151641
Esophageal Neoplasms	hsa-mir-204	0.001516
Breast Neoplasms	hsa-mir-574	0.00151596
Carcinoma, Squamous Cell	hsa-mir-30e	0.00151552
Breast Neoplasms	hsa-mir-1183	0.00151549
Breast Neoplasms	hsa-mir-1909	0.00151549
Carcinoma, Hepatocellular	hsa-mir-188	0.00151505
Esophageal Neoplasms	hsa-mir-135a	0.00151477
Cholangiocarcinoma	hsa-mir-145	0.00151463
Leukemia	hsa-mir-146a	0.00151461
Esophageal Neoplasms	hsa-mir-372	0.00151436
Colonic Neoplasms	hsa-mir-497	0.00151306
Leukemia, Lymphocytic, Chronic, B-Cell	hsa-let-7d	0.00151217
Melanoma	hsa-mir-376a	0.00151162
Carcinoma, Renal Cell	hsa-mir-181d	0.00151161
Lymphoma	hsa-let-7f	0.00151146
Adenocarcinoma	hsa-mir-30a	0.00151139
Medulloblastoma	hsa-mir-30c	0.00151106
Colorectal Neoplasms	hsa-mir-376c	0.00151095
Uterine Cervical Neoplasms	hsa-mir-181b	0.00151073
Fibroblasts	hsa-mir-146a	0.0015105
Francisella	hsa-mir-146a	0.0015105
Intervertebral Disk	hsa-mir-146a	0.0015105
Breast Neoplasms	hsa-mir-525	0.00151024
Colorectal Neoplasms, Hereditary Nonpolyposis	hsa-mir-21	0.00151015
Endometrial Neoplasms	hsa-mir-133a	0.0015097
Muscular Disorders, Atrophic	hsa-mir-1	0.0015095
Liver Neoplasms	hsa-mir-125b	0.00150879
Carcinoma, Hepatocellular	hsa-mir-583	0.00150823
Breast Neoplasms	hsa-mir-190b	0.00150777
Neoplasms	hsa-mir-383	0.00150678
Breast Neoplasms	hsa-mir-3148	0.0015065
Breast Neoplasms	hsa-mir-569	0.0015065
Osteosarcoma	hsa-mir-31	0.0015059
Esophageal Neoplasms	hsa-mir-497	0.00150587
Neuroblastoma	hsa-mir-200b	0.00150582
Bladder Neoplasms	hsa-mir-21	0.00150458
Urinary Bladder Neoplasms	hsa-mir-302d	0.00150395
Lymphoma	hsa-mir-199a	0.00150388
Carcinoma	hsa-let-7e	0.00150348
Medulloblastoma	hsa-mir-196a	0.00150322
Medulloblastoma	hsa-mir-15b	0.00150315
Carcinoma, Squamous Cell	hsa-mir-302a	0.00150298
Colonic Neoplasms	hsa-mir-196b	0.00150216
Head and Neck Neoplasms	hsa-mir-373	0.00150215
Carcinoma, Renal Cell	hsa-mir-149	0.00150201
Gastrointestinal Neoplasms	hsa-let-7i	0.001502
Carcinoma, Renal Cell	hsa-mir-449b	0.00150177
Lung Neoplasms	hsa-mir-488	0.00150166
Breast Neoplasms	hsa-mir-655	0.00150134
Breast Neoplasms	hsa-mir-765	0.00150125
Urinary Bladder Neoplasms	hsa-mir-32	0.00150102
Breast Neoplasms	hsa-mir-640	0.001501
Carcinoma, Hepatocellular	hsa-mir-611	0.00150076
Carcinoma, Hepatocellular	hsa-mir-654	0.00150076
Carcinoma, Hepatocellular	hsa-mir-662	0.00150076
Carcinoma, Hepatocellular	hsa-mir-600	0.00150076
Carcinoma, Hepatocellular	hsa-mir-769	0.00150076
Endometrial Neoplasms	hsa-mir-127	0.00150065
Breast Neoplasms	hsa-mir-1293	0.00150025
Cervical Neoplasms	hsa-mir-21	0.00150017
Endometrial Neoplasms	hsa-mir-106b	0.00150011
Lymphoma, Large B-Cell, Diffuse	hsa-mir-17	0.00149991
Retinoblastoma	hsa-mir-223	0.00149991
Breast Neoplasms	hsa-mir-3196	0.00149979
Breast Neoplasms	hsa-mir-2861	0.00149979
Carcinoma, Hepatocellular	hsa-mir-518c	0.00149968
Breast Neoplasms	hsa-mir-885	0.00149961
Ovarian Neoplasms	hsa-mir-424	0.0014995
Chordoma	hsa-mir-21	0.00149923
Medulloblastoma	hsa-mir-1	0.00149919
Carcinoma, Non-Small-Cell Lung	hsa-mir-95	0.00149918
Stomach Neoplasms	hsa-mir-216a	0.0014991
Nasopharyngeal Neoplasms	hsa-mir-19b	0.00149883
Ovarian Neoplasms	hsa-mir-151	0.00149849
Breast Neoplasms	hsa-mir-521	0.00149835
Carcinoma, Hepatocellular	hsa-mir-596	0.00149832
Gastrointestinal Neoplasms	hsa-mir-9	0.00149789
Leukemia, Myeloid	hsa-mir-34a	0.0014976
Breast Neoplasms	hsa-mir-490	0.00149758
Leukemia, Myeloid	hsa-mir-155	0.00149697
Stomach Neoplasms	hsa-mir-584	0.00149653
Breast Neoplasms	hsa-mir-711	0.00149628
Breast Neoplasms	hsa-mir-4792	0.00149595
Breast Neoplasms	hsa-mir-635	0.00149567
Breast Neoplasms	hsa-mir-1180	0.00149567
Breast Neoplasms	hsa-mir-1972	0.00149567
Breast Neoplasms	hsa-mir-566	0.00149567
Breast Neoplasms	hsa-mir-582	0.00149567
Breast Neoplasms	hsa-mir-589	0.00149567
Breast Neoplasms	hsa-mir-619	0.00149567
Breast Neoplasms	hsa-mir-627	0.00149567
Breast Neoplasms	hsa-mir-1247	0.00149567
Breast Neoplasms	hsa-mir-1273a	0.00149567
Breast Neoplasms	hsa-mir-1184	0.00149567
Cervical Intraepithelial Neoplasia	hsa-mir-21	0.00149555
Breast Neoplasms	hsa-mir-1827	0.00149537
Glioblastoma	hsa-mir-296	0.00149521
Breast Neoplasms	hsa-mir-369	0.00149518
Breast Neoplasms	hsa-mir-564	0.00149518
Breast Neoplasms	hsa-mir-767	0.00149508
Breast Neoplasms	hsa-mir-325	0.00149497
Carcinoma, Renal Cell	hsa-mir-383	0.00149493
Breast Neoplasms	hsa-mir-147b	0.00149475
Pancreatic Neoplasms	hsa-mir-139	0.00149473
Digestive System Neoplasms	hsa-mir-221	0.00149456
Mouth Neoplasms	hsa-mir-20a	0.0014944
Carcinoma, Renal Cell	hsa-mir-520b	0.00149404
Colonic Neoplasms	hsa-mir-339	0.00149363
Breast Neoplasms	hsa-mir-542	0.00149299
Adenocarcinoma	hsa-mir-124	0.00149291
Nasopharyngeal Neoplasms	hsa-mir-200a	0.00149276
Carcinoma, Renal Cell	hsa-mir-488	0.00149257
Neoplasms	hsa-mir-181d	0.00149251
Adrenocortical Carcinoma	hsa-mir-429	0.00149244
Breast Neoplasms	hsa-mir-873	0.00149236
HIV	hsa-mir-146a	0.00149225
Laryngeal Neoplasms	hsa-let-7a	0.00149187
Gastrointestinal Neoplasms	hsa-mir-101	0.00149161
Pancreatic Neoplasms	hsa-mir-130b	0.00149118
Leukemia, Lymphocytic, Chronic, B-Cell	hsa-mir-200b	0.0014908
Glioma	hsa-mir-219	0.00149065
Lymphoma	hsa-mir-142	0.00148969
Carcinoma, Renal Cell	hsa-mir-212	0.00148932
Breast Neoplasms	hsa-mir-519a	0.00148902
Breast Neoplasms	hsa-mir-1181	0.00148887
Prostatic Neoplasms	hsa-mir-491	0.00148874
Mouth Neoplasms	hsa-mir-200b	0.00148852
Breast Neoplasms	hsa-mir-592	0.00148804
Lymphoma, Non-Hodgkin	hsa-mir-17	0.00148804
Retinoblastoma	hsa-mir-203	0.00148716
Glioma	hsa-mir-192	0.00148691
Osteosarcoma	hsa-let-7e	0.00148686
Breast Neoplasms	hsa-mir-3179	0.00148652
Breast Neoplasms	hsa-mir-550b	0.00148652
Breast Neoplasms	hsa-mir-614	0.00148628
Breast Neoplasms	hsa-mir-648	0.00148628
Breast Neoplasms	hsa-mir-599	0.00148624
Neuroblastoma	hsa-mir-222	0.00148621
Breast Neoplasms	hsa-mir-1236	0.00148595
Breast Neoplasms	hsa-mir-548c	0.00148575
Breast Neoplasms	hsa-mir-636	0.00148561
Glioma	hsa-mir-23b	0.00148559
Ovarian Neoplasms	hsa-mir-28	0.00148536
Leukemia, Lymphocytic, Chronic, B-Cell	hsa-mir-142	0.0014853
Carcinoma, Hepatocellular	hsa-mir-557	0.00148513
Breast Neoplasms	hsa-mir-548a	0.00148501
Osteosarcoma	hsa-let-7c	0.00148488
Stomach Neoplasms	hsa-mir-382	0.00148469
Breast Neoplasms	hsa-mir-489	0.0014845
Thyroid Neoplasms	hsa-mir-133a	0.00148392
Breast Neoplasms	hsa-mir-624	0.00148374
Endometriosis	hsa-mir-29a	0.00148356
Endometriosis	hsa-mir-221	0.00148318
Breast Neoplasms	hsa-mir-545	0.00148292
[truncated: 182,156 more rows]
